# Supplementary material for: Acid–base interactions in luminescent silver( i ) and gold( i ) complexes with phosphine–phosphinate/phosphinite ligands
Source: Royal Society of Chemistry journal article supplement (doi:10.1039/d5qi01622c), 2025-11-04
Supplement: d5qi01622c1.pdf [file d5qi01622c1.pdf]

*Supporting Information for*

*Acid-base interactions in luminescent silver(I) and gold(I) complexes with  
phosphine-phosphinate/phosphinite ligands*

*Mariia Beliaeva,<sup>a</sup> Andrey Belyaev,<sup>a</sup> Henna Korhonen,<sup>a</sup> Ondrej Mrózek,<sup>b</sup> Janne Jänis,<sup>a</sup> Andreas  
Steffen,<sup>b\*</sup> Igor O. Koshevoy<sup>a\*</sup>*

<sup>a</sup> *Department of Chemistry and Sustainable Technology, University of Eastern Finland, Yliopistokatu 7, Joensuu,  
80101, Finland*

<sup>b</sup> *Department of Chemistry and Chemical Biology, TU Dortmund University, Otto-Hahn-Str. 6, 44227 Dortmund,  
Germany*

E-mail: [andreas.steffen@tu-dortmund.de](mailto:andreas.steffen@tu-dortmund.de); [igor.koshevoy@uef.fi](mailto:igor.koshevoy@uef.fi)

## Table of Contents

|                                                                                                                                                                                                                                                                                                              |     |
|--------------------------------------------------------------------------------------------------------------------------------------------------------------------------------------------------------------------------------------------------------------------------------------------------------------|-----|
| <b>Experimental section</b>                                                                                                                                                                                                                                                                                  | S3  |
| <b>Table S1.</b> Crystal data and structure refinement for <b>1–6</b> and <b>P<sup>3</sup>OOH</b> .                                                                                                                                                                                                          | S10 |
| <b>Tables S2–10.</b> Selected bond lengths (Å) and angles (°) for <b>1–6</b> and <b>P<sup>3</sup>OOH</b> .                                                                                                                                                                                                   | S15 |
| <b>Figure S1.</b> Molecular view of hydrogen-bonded dimer of <b>P<sup>3</sup>OOH</b> .                                                                                                                                                                                                                       | S20 |
| <b>Figure S2.</b> Molecular views of <b>1</b> (X/H <sub>2</sub> O) modification.                                                                                                                                                                                                                             | S20 |
| <b>Figure S3.</b> Powder X-ray diffraction patterns for <b>1</b> (MeOH) and solvent free <b>1</b> .                                                                                                                                                                                                          | S21 |
| <b>Figure S4.</b> <sup>31</sup> P { <sup>1</sup> H} NMR spectra of complexes <b>1–4</b> (297 K).                                                                                                                                                                                                             | S22 |
| <b>Figure S5.</b> ESI <sup>+</sup> -MS of compounds <b>1–6</b> .                                                                                                                                                                                                                                             | S23 |
| <b>Figure S6.</b> Molecular view of co-crystallized <b>5</b> and <b>6</b> refined as a 2:1 mixture.                                                                                                                                                                                                          | S23 |
| <b>Figure S7.</b> Powder X-ray diffraction patterns for <b>5*</b> and <b>6</b> .                                                                                                                                                                                                                             | S24 |
| <b>Figure S8.</b> <sup>1</sup> H NMR spectra of <b>5</b> and <b>5+H<sup>+</sup></b> .                                                                                                                                                                                                                        | S24 |
| <b>Figure S9.</b> Variable temperature <sup>31</sup> P { <sup>1</sup> H} NMR spectra of <b>5*</b> and <b>5 +H<sup>+</sup></b> .                                                                                                                                                                              | S25 |
| <b>Figure S10.</b> UV-vis absorption spectra of <b>1–4</b> , <b>6</b> , <b>6+H<sup>+</sup></b> and <b>P<sup>3</sup>OOH</b> .                                                                                                                                                                                 | S25 |
| <b>Figure S11.</b> TD-DFT calculated transition density differences for vertical excitation from the DFT optimized ground state S <sub>0</sub> to the S <sub>1</sub> (left) and T <sub>1</sub> (right) excited states for <b>1</b> , <b>2<sup>2+</sup></b> , <b>5<sup>+</sup></b> and <b>6<sup>+</sup></b> . | S26 |
| <b>Table S11.</b> TD-DFT calculated vertical electronic transitions from the ground state S <sub>0</sub> at the geometry of the DFT optimized ground state S <sub>0</sub> and triplet state T <sub>1</sub> of <b>1</b> to the first 10 and 5 singlet and triplet excited states, respectively.               | S27 |
| <b>Table S12.</b> TD-DFT calculated vertical electronic transitions from the DFT optimized ground state S <sub>0</sub> of <b>2<sup>2+</sup></b> to the first 10 singlet and triplet excited states.                                                                                                          | S28 |
| <b>Table S13.</b> TD-DFT calculated vertical electronic transitions from the DFT optimized ground state S <sub>0</sub> of <b>5<sup>+</sup></b> to the first 10 singlet and triplet excited states.                                                                                                           | S29 |
| <b>Table S14.</b> TD-DFT calculated vertical electronic transitions from the DFT optimized ground state S <sub>0</sub> of <b>6<sup>+</sup></b> to the first 10 singlet and triplet excited states.                                                                                                           | S30 |
| <b>Figure S12–S14.</b> TD-DFT calculated transition density differences of selected vertical excitations from the DFT-optimized ground state S <sub>0</sub> for <b>1</b> , <b>2<sup>2+</sup></b> , <b>6<sup>+</sup></b> .                                                                                    | S31 |
| <b>Table S15.</b> Photophysical properties of <b>6</b> and <b>6+H<sup>+</sup></b> in solution (297 K).                                                                                                                                                                                                       | S32 |
| <b>Figure S15.</b> Normalized excitation and emission spectra of <b>P<sup>3</sup>OOH</b> in the solid state.                                                                                                                                                                                                 | S32 |
| <b>Figure S16.</b> Normalized excitation and emission spectra of <b>1–3</b> , <b>6</b> and <b>5*</b> in the solid state at 77 K.                                                                                                                                                                             | S33 |
| <b>Figure S17.</b> Variable temperature excitation and emission spectra, intensity decays, observed average lifetimes of complex <b>6</b> in the solid state.                                                                                                                                                | S33 |
| <b>References</b>                                                                                                                                                                                                                                                                                            | S34 |

## Experimental

**General comments.** (2-Bromophenyl)diphenylphosphine,<sup>1</sup> chloro(tetrahydrothiophene)gold(I) (Au(tht)Cl),<sup>2</sup> silver phenylacetylide (AgC<sub>2</sub>Ph),<sup>3</sup> bis(2-(diphenylphosphanyl)phenyl)phosphine oxide (HP<sup>3</sup>O),<sup>4</sup> [Ag<sub>2</sub>(P<sup>3</sup>O)<sub>2</sub>]<sup>4</sup> [Au<sub>2</sub>(P<sup>3</sup>O)<sub>2</sub>]<sup>5</sup> were prepared according to the published procedures. Organic solvents for the syntheses and photophysical measurements were of HPLC grade. Tetrahydrofuran (THF) and toluene for the preparation of the phosphine ligand were distilled over Na-benzophenone ketyl under a nitrogen atmosphere prior to use. Dichloromethane and THF for the preparation of complexes were purified in a PureSolv MD 7 solvent purification system and further degassed by freeze-pump-thaw technique. Other reagents and solvents were used as received. All reactions were carried out under an inert nitrogen or argon atmosphere. The solution <sup>1</sup>H, <sup>31</sup>P{<sup>1</sup>H}, <sup>19</sup>F{<sup>1</sup>H}, <sup>31</sup>P–<sup>31</sup>P COSY NMR spectra were recorded on Bruker 400 MHz Avance, Avance III HD NanoBay-400 MHz, Avance NEO-500 MHz, AMX-400 MHz and JEOL-500 MHz spectrometers. Mass spectrometry experiments were performed on an Agilent 6560 ESI-IM-QTOF and Agilent 6530 UHPLC-QTOF mass spectrometers equipped with AJS ESI ion source. Samples were injected using direct infusion from a syringe pump with a flowrate of 5 µl/min. Nitrogen was used as dry-, sheath and nebulizer gas from nitrogen generator. A dry-gas temperature of 225° C, drying gas flow rate of 5 l/min, nebulizer pressure of 30 psi, sheath gas temperature of 225° C and sheath gas flow of 10 l/min were used. Capillary voltage of 2000 V and fragmentation voltage of 400 V were set as source parameters. The mass spectrometer was calibrated with an ES tuning mix from Agilent Technologies. Data was acquired with MassHunter Acquisition B.09.00 and analysed using MassHunter Qualitative analysis B.08.00 as software packages from Agilent Technologies, USA. Microanalyses were carried out in the analytical laboratories of the University of Eastern Finland and TU Dortmund.

### Bis-(2-diphenylphosphino)phosphinic acid (P<sup>3</sup>OOH).

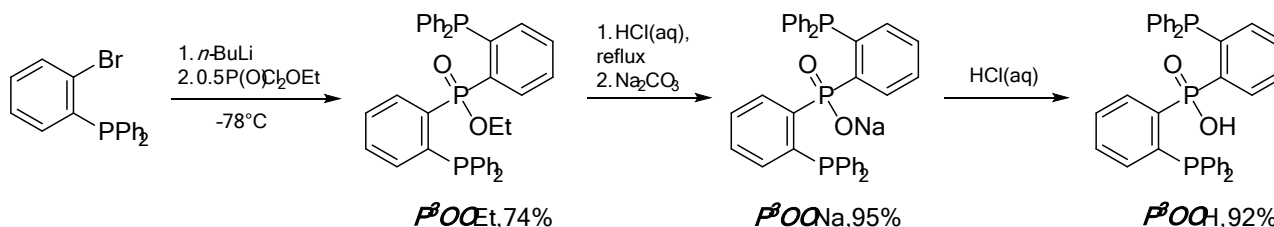

(2-Bromophenyl)diphenylphosphine (9.3 g, 27.2 mmol) was dissolved in freshly distilled THF (100 mL), cooled to -78 °C and a solution of *n*-BuLi in hexanes (1.6 M, 18.7 mL, 29.9 mmol) was added dropwise within 40 min. The reaction mixture was stirred below -70° C for 1 hour and treated dropwise with ethyl phosphorodichloridate (2.5 g, 15.5 mmol) to give dark orange-brown solution. It was slowly heated to room temperature and the solvents were removed in *vacuo*. The resulting oily

material of ethyl bis(2-(diphenylphosphaneyl)phenyl)phosphinate (**P<sup>3</sup>OOEt**) was digested with methanol (10 ml) under ultrasonification to give white microcrystalline product, which was collected by filtration and dried (6.1 g, 74 %).

In the next step, the intermediate compound **P<sup>3</sup>OOEt** (3.9 g, 6.3 mmol) was treated with an excess of concentrated hydrochloric acid upon refluxing for 12 hours and then extracted with dichloromethane (40 ml). The combined organic layers were neutralized by aqueous solution of Na<sub>2</sub>CO<sub>3</sub>, leading to the precipitation of sodium bis(2-(diphenylphosphaneyl)phenyl)phosphinate (**P<sup>3</sup>OONa**), which was collected and washed with diethyl ether, acetone and dried (3.7 g, 95%). Subsequent treatment of a methanol solution (50 ml) of **P<sup>3</sup>OONa** (513 mg, 0.8 mmol) with equimolar amount of hydrochloric acid (37 %, 110 µl) leads to the precipitation of bis(2-(diphenylphosphaneyl)phenyl)phosphinic acid (**P<sup>3</sup>OOH**). It was collected, washed with water, methanol and dried under vacuum to give the pure ligand as a white microcrystalline solid (456 mg, 92%). Single crystals for the XRD structural analysis were obtained by a gas-phase diffusion of diethyl ether into a dichloromethane solution of **c** at -18° C. <sup>1</sup>H NMR (400 MHz, CDCl<sub>3</sub>, 297 K; δ): 13.32 (s br, 1H), 8.35 (dddt, *J*<sub>PH</sub> 11.3 Hz and 7.7 Hz, *J*<sub>HH</sub> 3.4 Hz and 1.6 Hz, 2H), 7.36–7.42 (m, 2H), 7.29–7.37 (m, 6H), 7.20–7.29 (m, 10H), 7.09 (td, *J*<sub>PH</sub> 7.7 Hz, *J*<sub>HH</sub> 7.6 Hz and 1.3 Hz, 8H). <sup>31</sup>P{<sup>1</sup>H} NMR (162 MHz, CDCl<sub>3</sub>, 297 K; δ): 33.5 (t, <sup>3</sup>*J*<sub>PP</sub> 11.3 Hz, 1P, P(O)OH), -14.5 (d, <sup>3</sup>*J*<sub>PP</sub> 11.3 Hz, 2P, PPh<sub>2</sub>).

[Ag<sub>2</sub>(**P<sup>3</sup>OO**)<sub>2</sub>] (**1**). **P<sup>3</sup>OOH** (200 mg, 0.34 mmol) and silver phenylacetylenide AgC<sub>2</sub>Ph (72 mg, 0.34 mmol) were suspended in dichloromethane (50 mL). The reaction mixture was stirred for 4 hours in the absence of light to give nearly transparent colorless solution. The solvent was evaporated *in vacuo*. The colorless residue was washed with diethyl ether (3×3 mL) under ultrasonification. The resulting solid was recrystallized by the slow evaporation of a methanol/acetonitrile solution at room temperature to give white crystalline material (157 mg, 67 %). <sup>1</sup>H NMR (400 MHz, CD<sub>2</sub>Cl<sub>2</sub>, 297 K; δ): 7.45 (m, 1H), 7.14–7.30 (m, 6H), 7.04–7.15 (m, 4H), 7.01–7.04 (m, 12H), 7.00 (m, 3H), 6.79–6.86 (m, 2H). <sup>31</sup>P{<sup>1</sup>H} NMR (162 MHz, CD<sub>2</sub>Cl<sub>2</sub>, 297 K; δ): 25.9 (s br, 1P, P(O)O), 4.4 (d br, <sup>1</sup>*J*<sub>P<sub>Ag</sub></sub> ca. 230 Hz, 1P, PPh<sub>2</sub>), 2.9 (d br, <sup>1</sup>*J*<sub>P<sub>Ag</sub></sub> ca. 230 Hz, 1P, PPh<sub>2</sub>). ESI-MS (*m/z*): [M+H]<sup>+</sup> 1387.0783 (calcd 1387.0784). Anal. Calcd for C<sub>72</sub>H<sub>56</sub>Ag<sub>2</sub>O<sub>4</sub>P<sub>6</sub>·4CH<sub>3</sub>OH: C, 60.25; H, 4.79. Found: C, 60.14; H, 4.34.

[Ag<sub>2</sub>(**P<sup>3</sup>OOH**)<sub>2</sub>](CF<sub>3</sub>SO<sub>3</sub>)<sub>2</sub> (**2**). **P<sup>3</sup>OOH** (100 mg, 0.17 mmol) and AgCF<sub>3</sub>SO<sub>3</sub> (44 mg, 0.17 mmol) were dissolved in tetrahydrofuran (20 mL) and stirred for 4 hours in the absence of light. The product partially precipitated from the reaction mixture. The solvent was evaporated *in vacuo* and the residue was treated with diethyl ether (2×5 mL) under ultrasonification. Recrystallization by cooling the saturated solution of crude **2** in dichloromethane/methanol/diethyl ether (4:1:8 v/v mixture, 13 ml) to

–18 °C gave colorless crystalline material (113 mg, 79 %). Single crystals for the XRD structural analysis were obtained by a gas-phase diffusion of diethyl ether into a dichloromethane/methanol solution of **2** at room temperature.  $^1\text{H}$  NMR (400 MHz,  $\text{CD}_2\text{Cl}_2$ , 193 K;  $\delta$ ): 15.33 (br, 1H), 8.00–7.75 (m, 4H), 7.66–6.76 (m, 42H), 6.67–6.10 (m, 8H), 5.69 (m, 2H).  $^{31}\text{P}\{^1\text{H}\}$  NMR (162 MHz,  $\text{CD}_2\text{Cl}_2$ , 297 K;  $\delta$ ): 34.8 (m, 3P), 31.7 (m, 1P), 30.2 (d,  $J_{\text{PP}}$  4.6 Hz, 1P), 28.9 (t,  $J_{\text{PP}}$  4.6 Hz, 1P), 5.6–8.2 (m, 6P), –4.8–5.6 (m, 6P). ESI-MS ( $m/z$ ):  $[\text{0.5M}]^+$  695.0455 (calcd 695.0427). Anal. Calcd for  $\text{C}_{74}\text{H}_{58}\text{Ag}_2\text{F}_6\text{O}_{10}\text{P}_6\text{S}_2$ : C, 52.69; H, 3.47. Found: C, 52.70; H, 3.66.

**[Ag<sub>3</sub>(P<sup>3</sup>OO)<sub>3</sub>H]CF<sub>3</sub>SO<sub>3</sub> (3).** **P<sup>3</sup>OOH** (200 mg, 0.340 mmol),  $\text{AgC}_2\text{Ph}$  (48 mg, 0.227 mmol) and  $\text{AgCF}_3\text{SO}_3$  (30 mg, 0.114 mmol) were suspended in dichloromethane (30 mL) and stirred for 2 hours in the absence of light to give nearly transparent colorless solution. The solvent was evaporated in *vacuo* and the residue was treated with diethyl ether (2×5 mL) under ultrasonification. The resulting solid was recrystallized by cooling its saturated solution in dichloromethane/diethyl ether (1:3 v/v mixture, 12 ml) to –18 °C to give white crystalline material (115 mg, 91 %). Single crystals for the XRD structural analysis were obtained by slow evaporation of a chloroform/hexane solution of **3** at room temperature.  $^1\text{H}$  NMR (400 MHz,  $\text{CD}_2\text{Cl}_2$ , 297 K;  $\delta$ ): 8.15–8.27 (m, 1H), 7.81–7.99 (m, 3H), 7.57–7.70 (m, 3H), 7.54 (d,  $J_{\text{PH}}$  8.9 Hz, 2H), 7.38–7.50 (m, 2H), 7.12–7.39 (m, 15H), 7.07–7.12 (m, 4H), 6.96–7.07 (m, 10H), 6.88–6.96 (m, 13H), 6.79–6.88 (m, 4H), 6.69–6.78 (m, 6H), 6.66 (ddd,  $J_{\text{PH}}$  16.0 Hz,  $J_{\text{HH}}$  7.2 Hz and 2.1 Hz, 6H), 6.47–6.59 (m, 4H), 6.34–6.47 (m, 4H), 6.30–6.34 (m, 2H), 6.22–6.30 (m, 4H), 6.02 (ddq,  $J_{\text{PH}}$  8.9 Hz,  $J_{\text{HH}}$  7.5 Hz and 1.4 Hz, 1H), 5.90 (dddd,  $J_{\text{PH}}$  13.5 Hz,  $J_{\text{HH}}$  7.9 Hz, 4.3 and 1.4 Hz, 1H).  $^{31}\text{P}\{^1\text{H}\}$  NMR (162 MHz,  $\text{CD}_2\text{Cl}_2$ , 293 K;  $\delta$ ): 31.5 (s, 1P), 30.1 (d,  $J_{\text{PP}}$  4.4 Hz, 1P), 28.8 (t,  $J_{\text{PP}}$  4.4 Hz, 1P), 6.1 to –5.7 (m, 6P). ESI-MS ( $m/z$ ):  $[\text{M}]^+$  2081.1113 (calcd 2081.1163). Anal. Calcd for  $\text{C}_{109}\text{H}_{85}\text{Ag}_3\text{F}_3\text{O}_9\text{P}_9\text{S}$ : C, 58.70; H, 3.84. Found: C, 58.33; H, 3.74.

**[Au<sub>2</sub>(P<sup>3</sup>OH)<sub>2</sub>]Cl<sub>2</sub> (4).** Bis-(2-diphenylphosphino)phosphine oxide **HP<sub>3</sub>O<sup>4</sup>** (100 mg, 0.175 mmol) and  $\text{Au}(\text{tht})\text{Cl}$  (56 mg, 0.175 mmol) were dissolved in dichloromethane (10 mL) and stirred for 4 hours in the absence of light. The solvent was evaporated in *vacuo*. The residue was treated with diethyl ether (2×5 mL) under ultrasonification. The resulting solid was recrystallized by a gas-phase diffusion of diethyl ether into a dichloromethane solution of **4** at room temperature to give yellow crystals (115 mg, 82 %).  $^1\text{H}$  NMR (500 MHz,  $\text{CD}_2\text{Cl}_2$ , 297 K;  $\delta$ ): 11.6 (v br, POH), 8.2–6.5 (br unresolved m).  $^{31}\text{P}\{^1\text{H}\}$  NMR (202 MHz,  $\text{CD}_2\text{Cl}_2$ , 297 K;  $\delta$ ): 101.4 (br, 2P), 30.3 (br, 2P), 18.7 (br, 2P). Anal. Calcd for  $\text{C}_{72}\text{H}_{58}\text{Au}_2\text{Cl}_2\text{O}_2\text{P}_6\text{CH}_2\text{Cl}_2$ : C, 51.86; H, 3.58. Found: C, 51.75; H, 3.95.

**[Au<sub>2</sub>(P<sup>3</sup>OO)<sub>2</sub>H]CF<sub>3</sub>SO<sub>3</sub> (5).** Au(tht)Cl (100 mg, 0.312 mmol) was dissolved in dichloromethane (10 mL) and P<sup>3</sup>OOH (183 mg, 0.312 mmol) was added. The colorless solution was stirred for 10 min. and treated with a solution of AgCF<sub>3</sub>SO<sub>3</sub> (80 mg, 0.311 mmol) in acetonitrile (5 mL). The mixture was stirred for 1 h protected from light, then the precipitate of AgCl was filtered off, solvents were evaporated to give colorless amorphous residue. Recrystallization by a gas phase diffusion of diethyl ether into an acetone solution of crude **5** gave colorless crystalline material of an acetone solvate (235 mg, 88 %), suitable for single crystal XRD structural analysis. Alternatively, crystallization by a slow evaporation of an acetonitrile-water solution of **5** at room temperature afforded the product as a colorless acetonitrile solvate. <sup>1</sup>H NMR (400 MHz, CD<sub>3</sub>CN, 233 K; δ): 18.23 (s, 1H), 6.23–8.26 (bm, 56H). <sup>31</sup>P{<sup>1</sup>H} NMR (162 MHz, CD<sub>3</sub>CN, 233 K; δ): ABX system 47.0 (d, <sup>2</sup>J<sub>PP</sub> 365 Hz, 1P, PPh<sub>2</sub>), 45.2 (d, <sup>2</sup>J<sub>PP</sub> 365 Hz, 1P, PPh<sub>2</sub>), 22.9 (s, 1P, P(O)OH). ESI-MS (*m/z*): [M]<sup>+</sup> 1565.1987 (calcd 1562.2008). Anal. Calcd for C<sub>73</sub>H<sub>57</sub>Au<sub>2</sub>F<sub>3</sub>O<sub>7</sub>P<sub>6</sub>S: C, 51.12; H, 3.35. Found: C, 51.03; H, 3.60.

**[Au<sub>3</sub>(P<sup>3</sup>O)<sub>2</sub>]CF<sub>3</sub>SO<sub>3</sub> (6).** Au(tht)Cl (21 mg, 0.066 mmol) and tetrahydrothiophene (3 drops) were dissolved in dichloromethane (5 mL) and a solution of AgCF<sub>3</sub>SO<sub>3</sub> (17 mg, 0.0661 mmol) in methanol (3 mL). The mixture was stirred for 30 min. protected from light, then the precipitate of AgCl was filtered off, and a pale-yellow solution was added dropwise to a yellow-orange solution of [Au<sub>2</sub>(P<sup>3</sup>O)<sub>2</sub>]<sup>5</sup> (100 mg, 0.065 mmol) in dichloromethane-methanol 9:1 v/v mixture (10 mL) under a nitrogen atmosphere. The stirring continued for 1h, then the resulting dark yellow solution with perceptible green luminescence was filtered to remove a small amount of dark solid and evaporated. The amorphous yellow residue was washed with pentane (2×5 mL) under ultrasonification. Recrystallization by a gas-phase diffusion of pentane into an acetonitrile-diethyl ether solution of crude **6** afforded pale-yellow crystalline material with bright sky-blue luminescence (94 mg, 77 %). <sup>1</sup>H NMR (500 MHz, CD<sub>2</sub>Cl<sub>2</sub>, 297 K; δ): 8.16 (m, 2H), 7.66 (dd, <sup>3</sup>J<sub>HP</sub> 13.1 Hz, <sup>2</sup>J<sub>HH</sub> 7.3 Hz, 6H), 7.56–7.23 (m, 30 H), 7.20 (t, <sup>2</sup>J<sub>HH</sub> 7.1 Hz, 2H), 7.10 (m, 6H), 7.03 (m, 2H), 6.88 (t, <sup>2</sup>J<sub>HH</sub> 9.2 Hz, 2H), 6.54 (dd, <sup>3</sup>J<sub>HP</sub> 11.4 Hz, <sup>2</sup>J<sub>HH</sub> 7.8 Hz, 4H). <sup>31</sup>P{<sup>1</sup>H} NMR (202 MHz, CD<sub>2</sub>Cl<sub>2</sub>, 297 K; δ): X<sub>2</sub>AA'BB' spin system 82.9 (*J*<sub>PP</sub> XA 13 Hz, XA' 12 Hz, XB 23 Hz, XA' 25 Hz, 2P, PO), 38.0 (*J*<sub>PP</sub> AB' and A'B 324 Hz, AX 13 Hz, A'X 12 Hz, AA' 1 Hz, 2P, PPh<sub>2</sub>), 35.0 (*J*<sub>PP</sub> BA' and B'A 324 Hz, BX 23 Hz, B'X 25 Hz, BB' 7 Hz, 2P, PPh<sub>2</sub>). ESI-MS (*m/z*): [M]<sup>+</sup> 1729.27014 (calcd 1729.17031). Anal. Calcd for C<sub>73</sub>H<sub>56</sub>Au<sub>3</sub>F<sub>3</sub>O<sub>5</sub>P<sub>6</sub>S: C, 46.66; H, 3.00. Found: C, 46.42; H, 3.31.

**Reaction of [Au<sub>2</sub>(P<sup>3</sup>OH)<sub>2</sub>]Cl<sub>2</sub> (5) with AgCF<sub>3</sub>SO<sub>3</sub>.** To a solution of complex **4** (75 mg, 0.047 mmol) in dichloromethane (7 mL) was added a solution of AgCF<sub>3</sub>SO<sub>3</sub> (25 mg, 0.094 mmol) in acetone (2 mL) and the mixture was stirred on air for 30 min. The precipitate of AgCl was filtered off and the

solvents were evaporated. The residue was treated with diethyl ether (2×3 mL) under ultrasonification. It was dissolved in acetonitrile, diluted with water and left for a slow evaporation to give light yellow crystalline material (38 mg, 46 %) identified as **4** doped with a few percent of **6s**.  $^1\text{H}$  NMR (400 MHz,  $\text{CD}_3\text{CN}$ , 233 K;  $\delta$ ): 18.23 (s, 1H), 6.23–8.26 (bm, 56H).  $^{31}\text{P}\{^1\text{H}\}$  NMR (162 MHz,  $\text{CD}_3\text{CN}$ , 233 K;  $\delta$ ): ABX system 47.0 (d,  $^2J_{\text{PP}}$  365 Hz, 1P,  $\text{PPh}_2$ ), 45.2 (d,  $^2J_{\text{PP}}$  365 Hz, 1P,  $\text{PPh}_2$ ), 22.9 (s, 1P,  $\text{P}(\text{O})\text{OH}$ ). ESI-MS ( $m/z$ ):  $[\text{M}]^+$  1565.1987 (calcd 1562.2008). Anal. Calcd for  $\text{C}_{73}\text{H}_{57}\text{Au}_2\text{F}_3\text{O}_7\text{P}_6\text{S}\cdot\text{C}_3\text{H}_6\text{O}\cdot\text{H}_2\text{O}$ : C, 50.96; H, 3.66. Found: C, 51.03; H, 3.90.

**Reaction of  $[\text{Ag}_2(\text{P}^3\text{O})_2]$  with  $\text{CF}_3\text{SO}_3\text{H}$ .** A solution of  $[\text{Ag}_2(\text{P}^3\text{O})_2]$  (15 mg, 0.011 mmol) in dichloromethane (5 mL) was treated with 5 equivalents of  $\text{CF}_3\text{SO}_3\text{H}$  dissolved in methanol (1 mL) and the mixture was stirred on air for 30 min. The solvents were evaporated. The residue was treated with water (2×1 mL) under ultrasonification. The resulting solid was recrystallized by a gas-phase diffusion of diethyl ether into a dichloromethane/methanol (4:1 v/v mixture) solution at room temperature to give colorless crystalline material (11 mg, 59 %) identified as **2**.

**Reaction of  $[\text{Au}_2(\text{P}^3\text{O})_2]$  with  $\text{CF}_3\text{SO}_3\text{H}$ .** A solution of  $[\text{Au}_2(\text{P}^3\text{O})_2]$  (15 mg, 0.010 mmol) in dichloromethane (5 mL) was treated with 5 equivalents of  $\text{CF}_3\text{SO}_3\text{H}$  dissolved in acetonitrile (1 mL) and the mixture was stirred on air for 30 min to give a solution with bright green luminescence. The solvents were evaporated. The residue was treated with water (2×1 mL) under ultrasonification. The resulting solid was dissolved in acetonitrile, diluted with water and left for a slow evaporation to give light yellow crystalline material (9 mg, 52 %) showing sky-blue luminescence and identified as **5** doped with 1–2% of **6**.

**X-ray Structure Determination.** The crystals of  $\text{P}^3\text{OOH}$ , **1–6** were immersed in cryo oil, mounted in a Nylon loop, and measured at a temperature of 150 K. The diffraction data were collected with Bruker SMART APEX II, Kappa Apex II, Kappa Apex II Duo, Rigaku Super Nova and Synergy S diffractometers using Mo  $\text{K}\alpha$  ( $\lambda = 0.71073$  Å) and Cu  $\text{K}\alpha$  ( $\lambda = 1.5184$  Å) radiation. The APEX2<sup>6</sup> and CrysAlisPro<sup>7</sup> program packages were used for cell refinements and data reductions. The structures were solved by direct methods using the SHELXS-2018<sup>8</sup> programs with the WinGX<sup>9</sup> and Olex2<sup>10</sup> graphical user interface. A semiempirical or numeric absorption correction (SADABS<sup>11</sup> or CrysAlisPro<sup>7</sup>) was applied to all data. Structural refinements were carried out using SHELXL-2017/2019.<sup>8</sup>

Some of the partially lost solvent molecules were refined with partial occupancy (0.25 for water in **1**(X/H<sub>2</sub>O); 0.5 for acetone in **5**\*; 0.5 for diethyl ether in **6** (diethyl ether solvate); 0.5 and 0.25 for water in **6** (acetonitrile solvate)).

The OOP-C<sub>6</sub>H<sub>4</sub> group and two phenyl rings in **1**(X/H<sub>2</sub>O) were modeled as disordered between two positions each and refined with occupancies of 0.71/0.29, 0.73/0.27, and 0.70/0.30. The structure of **5**+**6** 2:1 mixture was refined with partial occupancies of O(3)⋯H(1)⋯O(4) (66.7%) and Au(1) (33.3%) components corresponding to compounds **5** and **6**. The CF<sub>3</sub>SO<sub>3</sub><sup>−</sup> counterion was disordered between two orientations and was modeled with occupancies of 0.38/0.62.

The crystallization solvent in **1**(X/H<sub>2</sub>O), **3**, **5** (acetonitrile solvate), **6** (diethyl ether solvate) was lost/disordered and could not be reliably determined. The contribution of missing solvent to the calculated structure factors was taken into account by using a SQUEEZE and BYPASS routines of PLATON<sup>12</sup> and Olex2, respectively,<sup>10</sup> and was not included in the unit cell content.

The positions of H<sub>2</sub>O hydrogen atoms in **1**(X/H<sub>2</sub>O) were estimated with CALC-OH program,<sup>13</sup> the O⋯H⋯O hydrogen atoms in **3**, **5**, **5**\* and **5**+**6** (2:1 mixture) were located from the difference Fourier map and constrained to ride on the parent atoms, with  $U_{\text{iso}} = 1.2\text{--}1.5 U_{\text{eq}}$  (parent atom). All other H atoms in **1**–**6** were positioned geometrically and constrained to ride on their parent atoms C–H = 0.95–0.99 Å, O–H = 0.84 and  $U_{\text{iso}} = 1.2\text{--}1.5 U_{\text{eq}}$  (parent atom). The crystallographic details are summarized in Table S1.

**Photophysical Measurements.** Both excitation and emission spectra of the samples were recorded on an Edinburgh Instrument FLS1000 spectrometer, equipped with a 450 W ozone-free Xenon arc lamp, double monochromators for the excitation and emission pathways, and a red-sensitive photomultiplier (PMT-980, 200–880 nm) as detector. Solutions of the **4** were prepared in the glovebox at 0.1 Å at the excitation wavelength and approx. at concentration of 10<sup>−5</sup> M, using solvents from purification system PureSolv MD 7, which were additionally degassed by freeze-pump-thaw technique. Absorption spectra were recorded on an Agilent Cary 5000 UV-Vis-NIR spectrophotometer (175–3300 nm range). The excitation and emission spectra were corrected using the standard corrections supplied by the manufacturer for the spectral power of the excitation source and the sensitivity of the detector. The solid state absorbance spectra at 297 K (BaSO<sub>4</sub> used as a reflectance reference standard) and quantum yields in range of 77 K–297 K were measured by use of an Oxford Microstat integrating cryosphere linked to an Edinburgh Instrument FLS1000 spectrometer by two fibre bundles. The luminescence lifetimes were measured using a pulsed 60 W Xenon microsecond flashlamp, with a repetition rate of 1–100 Hz, or LED pulsed laser diodes (365, 380, 450 nm) with a multichannel scaling (MCS) or Time-Correlated Single Photon Counting (TCSPC)



modules. The emission was collected at right angles to the excitation source with the emission wavelength selected using a double grated monochromator and detected by the respective PMT. Steady-state and time-resolved low temperature measurements were performed utilizing an Oxford Optistat DN cryostat. Origin Pro 2019 9.6.0, Cary WinUV, Fluoracel and FAST spectrometer operating software were used for data analysis and processing.

**DFT calculations.** DFT and TD-DFT calculations for complexes **1**, **2**<sup>2+</sup>, **5**<sup>+</sup> and **6**<sup>+</sup> were performed with the ORCA 6.0.1 program suite with tight SCF convergence criteria.<sup>14</sup> Geometry optimizations (gas-phase) omitting the respective anions were carried out with the BP86 functional<sup>15</sup> as implemented in ORCA, and a frequency analysis ensuring that the optimized structures correspond to energy minima. The def2-SVP<sup>16</sup> basis set was used for all atoms together with the auxiliary basis set SARC/J<sup>17-21</sup> in order to accelerate the computations within the framework of RI approximation. Relativistic effects were accounted for by employing the ZORA method as implemented for the def2-SVP basis set in Orca, and by employing the SARC-ZORA-TZVP<sup>19, 22</sup> basis set for the metal atoms. Van der Waals interactions have been considered by an empirical dispersion correction (Grimme-D3BJ).<sup>23, 24</sup> TD-DFT calculations for the first 20 singlet and triplet excited states of **1**, **2**<sup>2+</sup>, **5**<sup>+</sup> and **6**<sup>+</sup> were performed with the same basis sets, but the PBE0 functional<sup>25, 26</sup> was used. Representations of electronic transition differences at isovalues of 0.0005 were produced with orca\_plot as provided by ORCA 6.0.1 and with Chimera.<sup>27</sup>

**Table S1.** Crystal data and structure refinement for **1–6** and **P<sup>3</sup>OOH**.

| Identification code                       | <b>1</b>                                                                      | <b>1(MeOH)</b>                                                                 | <b>1(X/H<sub>2</sub>O)</b>                                                      |
|-------------------------------------------|-------------------------------------------------------------------------------|--------------------------------------------------------------------------------|---------------------------------------------------------------------------------|
| CCDC                                      | 2475264                                                                       | 2475266                                                                        | 2475265                                                                         |
| Empirical formula                         | C <sub>72</sub> H <sub>56</sub> Ag <sub>2</sub> O <sub>4</sub> P <sub>6</sub> | C <sub>80</sub> H <sub>88</sub> Ag <sub>2</sub> O <sub>12</sub> P <sub>6</sub> | C <sub>72</sub> H <sub>57</sub> Ag <sub>2</sub> O <sub>4.5</sub> P <sub>6</sub> |
| Formula weight                            | 1386.72                                                                       | 1643.06                                                                        | 1395.73                                                                         |
| T (K)                                     |                                                                               | 150(2)                                                                         |                                                                                 |
| $\lambda$ (Å)                             |                                                                               | 0.71073                                                                        |                                                                                 |
| Crystal system                            | Triclinic                                                                     | Triclinic                                                                      | Triclinic                                                                       |
| Space group                               | <i>P</i> $\bar{1}$                                                            | <i>P</i> $\bar{1}$                                                             | <i>P</i> $\bar{1}$                                                              |
| Unit cell dimensions                      |                                                                               |                                                                                |                                                                                 |
| a (Å)                                     | 11.2019(7)                                                                    | 12.0333(9)                                                                     | 12.1097(5)                                                                      |
| b (Å)                                     | 12.2462(7)                                                                    | 13.0167(10)                                                                    | 12.2400(4)                                                                      |
| c (Å)                                     | 12.8767(8)                                                                    | 14.1395(11)                                                                    | 13.4687(6)                                                                      |
| $\alpha$ (deg)                            | 62.205(2)                                                                     | 86.506(3)                                                                      | 97.831(3)                                                                       |
| $\beta$ (deg)                             | 70.808(2)                                                                     | 67.479(3)                                                                      | 112.619(4)                                                                      |
| $\gamma$ (deg)                            | 73.368(2)                                                                     | 67.237(2)                                                                      | 111.980(4)                                                                      |
| Volume (Å <sup>3</sup> )                  | 1456.98(16)                                                                   | 1876.6(3)                                                                      | 1614.72(13)                                                                     |
| Z                                         | 1                                                                             | 1                                                                              | 1                                                                               |
| $\rho_{\text{calc}}$ (Mg/m <sup>3</sup> ) | 1.580                                                                         | 1.454                                                                          | 1.435                                                                           |
| $\mu$ (mm <sup>-1</sup> )                 | 0.890                                                                         | 0.711                                                                          | 0.804                                                                           |
| F(000)                                    | 704                                                                           | 848                                                                            | 709                                                                             |
| Crystal size (mm <sup>3</sup> )           | 0.407×0.308×0.277                                                             | 0.425×0.329×0.294                                                              | 0.108×0.066×0.045                                                               |
| $\theta$ range for data collection (deg.) | 1.837 to 27.996                                                               | 1.994 to 29.999                                                                | 2.444 to 30.374                                                                 |
| Index ranges                              | -14≤h≤14,<br>-16≤k≤16,<br>-17≤l≤16                                            | -16≤h≤16,<br>-18≤k≤16,<br>-19≤l≤19                                             | -16≤h≤16, -16≤k≤16,<br>-18≤l≤19                                                 |
| Reflections collected                     | 34185                                                                         | 42610                                                                          | 15794                                                                           |
| Unique reflections                        | 7021                                                                          | 10864                                                                          | 8550                                                                            |
| R <sub>int</sub>                          | 0.0251                                                                        | 0.0193                                                                         | 0.0237                                                                          |
| Completeness to $\theta=25.242^\circ$     | 99.9 %                                                                        | 99.7 %                                                                         | 99.9 %                                                                          |
| Absorption correction                     | semi-empirical from equivalents                                               |                                                                                | numerical                                                                       |
| Max. and min. transmission                | 0.791 and 0.713                                                               | 0.818 and 0.752                                                                | 1.000 and 0.911                                                                 |
| Refinement method                         | Full-matrix least-squares on F <sup>2</sup>                                   |                                                                                |                                                                                 |
| Data / restraints / parameters            | 7021 / 0 / 379                                                                | 10864 / 10 / 458                                                               | 8550 / 57 / 484                                                                 |
| GOOF on F <sup>2</sup>                    | 1.040                                                                         | 1.076                                                                          | 1.027                                                                           |
| Final R indices                           | R <sub>1</sub> = 0.0276, wR <sub>2</sub> =                                    | R <sub>1</sub> = 0.0318, wR <sub>2</sub> =                                     | R <sub>1</sub> = 0.0393, wR <sub>2</sub> =                                      |

|                                                           |                                  |                                  |                                  |
|-----------------------------------------------------------|----------------------------------|----------------------------------|----------------------------------|
| $[I > 2\sigma(I)]^a$                                      | 0.0690                           | 0.0875                           | 0.0790                           |
| R indices (all data)                                      | $R_1 = 0.0325$ , $wR_2 = 0.0717$ | $R_1 = 0.0350$ , $wR_2 = 0.0902$ | $R_1 = 0.0559$ , $wR_2 = 0.0867$ |
| Largest diff. peak and hole ( $e \cdot \text{\AA}^{-3}$ ) | 1.779 and -0.611                 | 1.74 and -1.67                   | 0.809 and -0.888                 |

---

<sup>a</sup>  $R_1 = \Sigma ||F_o| - |F_c|| / \Sigma |F_o|$ ;  $wR_2 = [\Sigma [w(F_o^2 - F_c^2)^2] / \Sigma [w(F_o^2)^2]]^{1/2}$

---

**Table S1.** Continued.

| Identification code                       | 2                                                                        | 3                                                                        | 4                                                                        |
|-------------------------------------------|--------------------------------------------------------------------------|--------------------------------------------------------------------------|--------------------------------------------------------------------------|
| CCDC                                      | 2475267                                                                  | 2475268                                                                  | 2475269                                                                  |
| Empirical formula                         | $C_{74}H_{58}Ag_2F_6O_{10}P_6S_2$                                        | $C_{119}H_{99}Ag_3Cl_{21}F_3O_9P_9S$                                     | $C_{75}H_{64}Au_2Cl_8O_2P_6$                                             |
| Formula weight                            | 1686.88                                                                  | 3108.83                                                                  | 1860.61                                                                  |
| T (K)                                     |                                                                          | 150(2)                                                                   |                                                                          |
| $\lambda$ ( $\text{\AA}$ )                |                                                                          | 0.71073                                                                  |                                                                          |
| Crystal system                            | Triclinic                                                                | Triclinic                                                                | Monoclinic                                                               |
| Space group                               | $P\bar{1}$                                                               | $P\bar{1}$                                                               | $P2_1/n$                                                                 |
| Unit cell dimensions                      |                                                                          |                                                                          |                                                                          |
| a ( $\text{\AA}$ )                        | 12.5845(10)                                                              | 13.6740(7)                                                               | 23.0253(10)                                                              |
| b ( $\text{\AA}$ )                        | 12.8489(10)                                                              | 22.7670(12)                                                              | 20.6697(10)                                                              |
| c ( $\text{\AA}$ )                        | 12.9550(10)                                                              | 23.8565(13)                                                              | 34.6257(15)                                                              |
| $\alpha$ (deg)                            | 99.025(3)                                                                | 62.068(2)                                                                | 90                                                                       |
| $\beta$ (deg)                             | 114.193(3)                                                               | 79.031(2)                                                                | 108.1770(10)                                                             |
| $\gamma$ (deg)                            | 108.723(3)                                                               | 86.638(2)                                                                | 90                                                                       |
| Volume ( $\text{\AA}^3$ )                 | 1705.9(2)                                                                | 6437.8(6)                                                                | 15656.9(12)                                                              |
| Z                                         | 1                                                                        | 2                                                                        | 8                                                                        |
| $\rho_{\text{calc}}$ ( $\text{Mg/m}^3$ )  | 1.642                                                                    | 1.604                                                                    | 1.579                                                                    |
| $\mu$ ( $\text{mm}^{-1}$ )                | 0.854                                                                    | 1.075                                                                    | 4.182                                                                    |
| F(000)                                    | 852                                                                      | 3122                                                                     | 7312                                                                     |
| Crystal size ( $\text{mm}^3$ )            | 0.140×0.133×0.129                                                        | 0.365×0.279×0.114                                                        | 0.360×0.134×0.049                                                        |
| $\theta$ range for data collection (deg.) | 1.775 to 25.998                                                          | 1.649 to 27.545                                                          | 0.943 to 26.000                                                          |
| Index ranges                              | $-15 \leq h \leq 15$ ,<br>$-15 \leq k \leq 15$ ,<br>$-15 \leq l \leq 15$ | $-17 \leq h \leq 17$ ,<br>$-28 \leq k \leq 24$ ,<br>$-29 \leq l \leq 30$ | $-28 \leq h \leq 28$ ,<br>$-25 \leq k \leq 25$ ,<br>$-42 \leq l \leq 42$ |
| Reflections collected                     | 38818                                                                    | 83765                                                                    | 168755                                                                   |
| Unique reflections                        | 6698                                                                     | 28577                                                                    | 30799                                                                    |
| $R_{\text{int}}$                          | 0.0503                                                                   | 0.0485                                                                   | 0.1186                                                                   |
| Completeness to $\theta = 25.242^\circ$   | 100.0 %                                                                  | 99.8 %                                                                   | 100.0 %                                                                  |

|                                                  |                                             |                                            |                                            |
|--------------------------------------------------|---------------------------------------------|--------------------------------------------|--------------------------------------------|
| Absorption correction                            | semi-empirical from equivalents             |                                            | numerical                                  |
| Max. and min. transmission                       | 0.898 and 0.890                             | 0.887 and 0.695                            | 0.821 and 0.314                            |
| Refinement method                                | Full-matrix least-squares on F <sup>2</sup> |                                            |                                            |
| Data / restraints / parameters                   | 6698 / 6 / 452                              | 28577 / 12 / 1351                          | 30799 / 12 / 1679                          |
| GOOF on F <sup>2</sup>                           | 1.068                                       | 1.025                                      | 1.097                                      |
| Final R indices                                  | R <sub>1</sub> = 0.0587, wR <sub>2</sub> =  | R <sub>1</sub> = 0.0631, wR <sub>2</sub> = | R <sub>1</sub> = 0.0701, wR <sub>2</sub> = |
| [I>2sigma(I)] <sup>a</sup>                       | 0.1497                                      | 0.1602                                     | 0.1381                                     |
| R indices (all data)                             | R <sub>1</sub> = 0.0787, wR <sub>2</sub> =  | R <sub>1</sub> = 0.0995, wR <sub>2</sub> = | R <sub>1</sub> = 0.1197, wR <sub>2</sub> = |
|                                                  | 0.1607                                      | 0.1783                                     | 0.1537                                     |
| Largest diff. peak and hole (e.Å <sup>-3</sup> ) | 2.075 and -0.591                            | 2.030 and -1.201                           | 5.599 and -1.822                           |

---

<sup>a</sup> R<sub>1</sub> =  $\Sigma||F_o| - |F_c||/\Sigma|F_o|$ ; wR<sub>2</sub> =  $[\Sigma[w(F_o^2 - F_c^2)^2]/\Sigma[w(F_o^2)^2]]^{1/2}$ .

---

**Table S1.** Continued.

| Identification code                    | 5* (acetone solvate)                                                                           | 5 (acetonitrile solvate)                                                                                      | 5+6 2:1 mixture                                                                                                                        |
|----------------------------------------|------------------------------------------------------------------------------------------------|---------------------------------------------------------------------------------------------------------------|----------------------------------------------------------------------------------------------------------------------------------------|
| CCDC                                   | 2475270                                                                                        | 2475271                                                                                                       | 2475274                                                                                                                                |
| Empirical formula                      | C <sub>79</sub> H <sub>69</sub> Au <sub>2</sub> F <sub>3</sub> O <sub>9</sub> P <sub>6</sub> S | C <sub>79</sub> H <sub>66</sub> Au <sub>2</sub> F <sub>3</sub> N <sub>3</sub> O <sub>7</sub> P <sub>6</sub> S | C <sub>80</sub> H <sub>67.67</sub> Au <sub>2.33</sub> Cl <sub>2</sub> F <sub>3</sub> N <sub>3</sub> O <sub>6.33</sub> P <sub>6</sub> S |
| Formula weight                         | 1831.15                                                                                        | 1838.16                                                                                                       | 1977.56                                                                                                                                |
| T (K)                                  |                                                                                                | 150(2)                                                                                                        |                                                                                                                                        |
| λ (Å)                                  | 0.71073                                                                                        | 1.54184                                                                                                       | 1.54184                                                                                                                                |
| Crystal system                         | Monoclinic                                                                                     | Monoclinic                                                                                                    | Monoclinic                                                                                                                             |
| Space group                            | P2 <sub>1</sub> /c                                                                             | P2 <sub>1</sub> /c                                                                                            | P2 <sub>1</sub> /c                                                                                                                     |
| Unit cell dimensions                   |                                                                                                |                                                                                                               |                                                                                                                                        |
| a (Å)                                  | 14.2851(13)                                                                                    | 14.38860(10)                                                                                                  | 14.46810(10)                                                                                                                           |
| b (Å)                                  | 26.190(2)                                                                                      | 26.3090(2)                                                                                                    | 26.1628(2)                                                                                                                             |
| c (Å)                                  | 20.8252(19)                                                                                    | 20.55300(10)                                                                                                  | 20.76600(10)                                                                                                                           |
| α (deg)                                | 90                                                                                             | 90                                                                                                            | 90                                                                                                                                     |
| β (deg)                                | 94.625(2)                                                                                      | 96.6330(10)                                                                                                   | 96.2550(10)                                                                                                                            |
| γ (deg)                                | 90                                                                                             | 90                                                                                                            | 90                                                                                                                                     |
| Volume (Å <sup>3</sup> )               | 7765.8(12)                                                                                     | 7728.25(9)                                                                                                    | 7813.68(9)                                                                                                                             |
| Z                                      | 4                                                                                              | 4                                                                                                             | 4                                                                                                                                      |
| ρ <sub>calc</sub> (Mg/m <sup>3</sup> ) | 1.566                                                                                          | 1.580                                                                                                         | 1.681                                                                                                                                  |
| μ (mm <sup>-1</sup> )                  | 3.986                                                                                          | 8.972                                                                                                         | 10.645                                                                                                                                 |
| F(000)                                 | 3624                                                                                           | 3632                                                                                                          | 3882                                                                                                                                   |
| Crystal size (mm <sup>3</sup> )        | 0.254×0.209×0.108                                                                              | 0.223×0.045×0.026                                                                                             | 0.431×0.097×0.056                                                                                                                      |
| θ range for data collection (deg.)     | 2.113 to 26.000                                                                                | 2.740 to 80.161                                                                                               | 2.727 to 80.183                                                                                                                        |

|                                                     |                                                      |                                                      |                                                   |
|-----------------------------------------------------|------------------------------------------------------|------------------------------------------------------|---------------------------------------------------|
| Index ranges                                        | -17≤h≤17,<br>-32≤k≤32,<br>-25≤l≤25                   | -18≤h≤18,<br>-33≤k≤33,<br>-25≤l≤18                   | -18≤h≤18,<br>-31≤k≤32,<br>-23≤l≤26                |
| Reflections collected                               | 72221                                                | 79381                                                | 77052                                             |
| Unique reflections                                  | 15231                                                | 16398                                                | 16650                                             |
| R <sub>int</sub>                                    | 0.0573                                               | 0.0353                                               | 0.0422                                            |
| Completeness to θ=<br>25.242°/67.684°               | 99.7 %                                               | 99.9 %                                               | 99.9 %                                            |
| Absorption correction                               | numerical                                            |                                                      |                                                   |
| Max. and min.<br>transmission                       | 0.673 and 0.431                                      | 0.853 and 0.205                                      | 1.000 and 0.518                                   |
| Refinement method                                   | Full-matrix least-squares on F <sup>2</sup>          |                                                      |                                                   |
| Data / restraints /<br>parameters                   | 15231 / 118 / 937                                    | 16398 / 0 / 913                                      | 16650 / 61 / 1022                                 |
| GOOF on F <sup>2</sup>                              | 1.028                                                | 1.049                                                | 1.088                                             |
| Final R indices<br>[I>2σ(I)] <sup>a</sup>           | R <sub>1</sub> = 0.0358, wR <sub>2</sub> =<br>0.0777 | R <sub>1</sub> = 0.0338, wR <sub>2</sub> =<br>0.0890 | R <sub>1</sub> = 0.0462, wR <sub>2</sub> = 0.1148 |
| R indices (all data)                                | R <sub>1</sub> = 0.0566, wR <sub>2</sub> =<br>08     | R <sub>1</sub> = 0.0378, wR <sub>2</sub> =<br>0.0911 | R <sub>1</sub> = 0.0483, wR <sub>2</sub> = 0.1161 |
| Largest diff. peak and<br>hole (e.Å <sup>-3</sup> ) | 1.353 and -0.606                                     | 1.690 and -2.085                                     | 2.313 and -1.410                                  |

---

<sup>a</sup> R<sub>1</sub> = Σ||F<sub>o</sub>| - |F<sub>c</sub>||/Σ|F<sub>o</sub>|; wR<sub>2</sub> = [Σ[w(F<sub>o</sub><sup>2</sup> - F<sub>c</sub><sup>2</sup>)<sup>2</sup>]/ Σ[w(F<sub>o</sub><sup>2</sup>)<sup>2</sup>]<sup>1/2</sup>.

**Table S1.** Continued.

| Identification code  | 6 (diethyl ether<br>solvate)                                                                                    | 6 (acetonitrile solvate)                                                                                                          | P <sup>3</sup> OOH                                            |
|----------------------|-----------------------------------------------------------------------------------------------------------------|-----------------------------------------------------------------------------------------------------------------------------------|---------------------------------------------------------------|
| CCDC                 | 2475272                                                                                                         | 2475273                                                                                                                           | 2475275                                                       |
| Empirical formula    | C <sub>150</sub> H <sub>122</sub> Au <sub>6</sub> F <sub>6</sub> O <sub>11</sub> P <sub>12</sub> S <sub>2</sub> | C <sub>316</sub> H <sub>270</sub> Au <sub>12</sub> F <sub>12</sub> N <sub>12</sub> O <sub>25</sub> P <sub>24</sub> S <sub>4</sub> | C <sub>36</sub> H <sub>29</sub> O <sub>2</sub> P <sub>3</sub> |
| Formula weight       | 3832.03                                                                                                         | 8098.54                                                                                                                           | 586.50                                                        |
| T (K)                |                                                                                                                 | 150(2)                                                                                                                            |                                                               |
| λ (Å)                | 1.54184                                                                                                         | 1.54184                                                                                                                           | 0.71073                                                       |
| Crystal system       | Orthorhombic                                                                                                    | Orthorhombic                                                                                                                      | Triclinic                                                     |
| Space group          | <i>Pbca</i>                                                                                                     | <i>Pbca</i>                                                                                                                       | <i>P</i> $\bar{1}$                                            |
| Unit cell dimensions |                                                                                                                 |                                                                                                                                   |                                                               |
| a (Å)                | 25.0213(3)                                                                                                      | 24.87400(10)                                                                                                                      | 9.2537(5)                                                     |
| b (Å)                | 23.7785(3)                                                                                                      | 23.95100(10)                                                                                                                      | 11.5109(7)                                                    |
| c (Å)                | 25.5290(3)                                                                                                      | 25.32280(10)                                                                                                                      | 15.2834(9)                                                    |
| α (deg)              | 90                                                                                                              | 90                                                                                                                                | 95.663(2)                                                     |
| β (deg)              | 90                                                                                                              | 90                                                                                                                                | 94.800(2)                                                     |

|                                                      |                                    |                                    |                                    |
|------------------------------------------------------|------------------------------------|------------------------------------|------------------------------------|
| $\gamma$ (deg)                                       | 90                                 | 90                                 | 109.560(2)                         |
| Volume ( $\text{\AA}^3$ )                            | 15189.0(3)                         | 15189.0(3)                         | 1514.66(15)                        |
| Z                                                    | 4                                  | 2                                  | 2                                  |
| $\rho_{\text{calc}}$ ( $\text{Mg/m}^3$ )             | 1.676                              | 1.783                              | 1.286                              |
| $\mu$ ( $\text{mm}^{-1}$ )                           | 12.583                             | 12.727                             | 0.228                              |
| F(000)                                               | 7400                               | 7860                               | 612                                |
| Crystal size ( $\text{mm}^3$ )                       | 0.208×0.162×0.010                  | 0.256×0.163×0.155                  | 0.295×0.237×0.214                  |
| $\theta$ range for data collection (deg.)            | 3.094 to 80.298                    | 3.491 to 80.104                    | 3.354 to 35.043                    |
| Index ranges                                         | -16≤h≤31,<br>-28≤k≤30,<br>-30≤l≤32 | -31≤h≤29,<br>-30≤k≤20,<br>-25≤l≤32 | -14≤h≤14,<br>-16≤k≤17,<br>-23≤l≤22 |
| Reflections collected                                | 68115                              | 72272                              | 38971                              |
| Unique reflections                                   | 16087                              | 16106                              | 11710                              |
| $R_{\text{int}}$                                     | 0.0487                             | 0.0428                             | 0.0349                             |
| Completeness to $\theta=25.242^\circ/67.684^\circ$   | 99.8 %                             | 100.0 %                            | 99.8 %                             |
| Absorption correction                                | numerical                          |                                    |                                    |
| Max. and min. transmission                           | 1.000 and 0.511                    | 0.499 and 0.150                    | 0.953 and 0.936                    |
| Refinement method                                    | Full-matrix least-squares on $F^2$ |                                    |                                    |
| Data / restraints / parameters                       | 16087 / 6 / 867                    | 16106 / 12 / 930                   | 11710 / 0 / 371                    |
| GOOF on $F^2$                                        | 1.083                              | 1.064                              | 1.036                              |
| Final R indices<br>[ $I > 2\sigma(I)$ ] <sup>a</sup> | $R_1 = 0.0587$ , $wR_2 = 0.1448$   | $R_1 = 0.0346$ , $wR_2 = 0.0917$   | $R_1 = 0.0440$ , $wR_2 = 0.1000$   |
| R indices (all data)                                 | $R_1 = 0.0679$ , $wR_2 = 0.1504$   | $R_1 = 0.0373$ , $wR_2 = 0.0934$   | $R_1 = 0.0708$ , $wR_2 = 0.1116$   |
| Largest diff. peak and hole ( $\text{e.\AA}^{-3}$ )  | 2.511 and -1.719                   | 1.302 and -0.892                   | 0.475 and -0.322                   |

---

<sup>a</sup>  $R_1 = \Sigma ||F_o| - |F_c|| / \Sigma |F_o|$ ;  $wR_2 = [\Sigma [w(F_o^2 - F_c^2)^2] / \Sigma [w(F_o^2)^2]]^{1/2}$ .

---

**Table S2.** Selected bond lengths (Å) and angles (°) for *P<sup>3</sup>OOH*.

| Bond length, Å |            | Bond angle, °   |           |
|----------------|------------|-----------------|-----------|
| P(2)–C(1)      | 1.8258(15) | O(1)–P(1)–C(18) | 109.65(5) |
| P(2)–C(7)      | 1.8335(14) | O(1)–P(1)–C(19) | 110.14(5) |
| P(2)–C(13)     | 1.8458(12) | O(1)–P(1)–O(2)  | 114.54(5) |
| P(1)–C(18)     | 1.8019(12) | O(2)–P(1)–C(18) | 104.25(5) |
| P(1)–C(19)     | 1.8031(13) | O(2)–P(1)–C(19) | 107.74(5) |
| P(3)–C(24)     | 1.8470(11) |                 |           |
| P(3)–C(25)     | 1.8346(13) |                 |           |
| P(3)–C(31)     | 1.8283(14) |                 |           |
| P(1)–O(1)      | 1.4973(9)  |                 |           |
| P(1)–O(2)      | 1.5505(9)  |                 |           |
| O(2)···O(1')   | 2.551(1)   |                 |           |

**Table S3.** Selected bond lengths (Å) angles (°) for complex **1**(MeOH).

| Bond length, Å |            | Bond angles, °    |             |
|----------------|------------|-------------------|-------------|
| Ag(1)–O(1)     | 2.3611(13) | O(1)–Ag(1)–P(2)   | 138.24(3)   |
| Ag(1)–O(1)'    | 2.4990(13) | O(1)–Ag(1)–P(3)   | 83.63(3)    |
| Ag(1)–P(2)'    | 2.3994(4)  | P(2)–Ag(1)–P(3)   | 138.115(16) |
| Ag(1)–P(3)     | 2.4378(5)  | O(1)–Ag(1)–O(1)'  | 80.12(5)    |
| Ag(1)'–O(1)    | 2.4990(13) | P(2)–Ag(1)–O(1)'  | 80.30(3)    |
| O(1)–P(1)      | 1.4988(13) | P(3)–Ag(1)–O(1)'  | 114.04(3)   |
| O(2)–P(1)      | 1.5038(14) | Ag(1)–O(1)–Ag(1)' | 99.88(5)    |
|                |            | P(1)–O(1)–Ag(1)'  | 135.91(7)   |
|                |            | P(1)–O(1)–Ag(1)   | 123.57(7)   |

**Table S4** Selected bond lengths (Å) and angles (°) for complex **1**(X/H<sub>2</sub>O) (major component).

| Bond length, Å |           | Bond angle, °     |            |
|----------------|-----------|-------------------|------------|
| Ag(1)–O(1)     | 2.446(3)  | O(1)–Ag(1)–P(2)   | 129.36(8)  |
| Ag(1)–O(2)     | 2.466(3)  | O(2)–Ag(1)–P(3)   | 143.38(6)  |
| Ag(1)–P(2)     | 2.4640(8) | P(2)–Ag(1)–P(3)   | 128.43(3)  |
| Ag(1)–P(3)     | 2.4416(7) | O(2)–Ag(1)–O(1)   | 100.30(10) |
| O(1)–P(1')     | 1.501(3)  | P(1')–O(1)–Ag(1)' | 129.99(17) |
| O(2)–P(1)      | 1.503(3)  | P(1)–O(2)–Ag(1)   | 97.27(15)  |

**Table S5.** Selected bond lengths (Å) and angles (°) for complex **1**.

| Bond length, Å |            | Bond angle, °     |             |
|----------------|------------|-------------------|-------------|
| Ag(1)–O(1)     | 2.4615(14) | P(2)–Ag(1)–P(3)'  | 130.033(17) |
| Ag(1)–O(2)'    | 2.4552(14) | P(2)–Ag(1)–O(2)'  | 137.17(4)   |
| Ag(1)–P(2)     | 2.4338(5)  | P(3)'–Ag(1)–O(2)' | 91.36(4)    |
| Ag(1)–P(3)'    | 2.4517(5)  | P(2)–Ag(1)–O(1)   | 70.71(3)    |
| O(1)–P(1)      | 1.4979(14) | P(3)'–Ag(1)–O(1)  | 128.14(3)   |
| O(2)–P(1)      | 1.5056(14) | O(2)'–Ag(1)–O(1)  | 93.60(5)    |
|                |            | P(1)–O(1)–Ag(1)   | 124.89(8)   |
|                |            | P(1)–O(2)–Ag(1)'  | 97.47(7)    |

**Table S6.** Selected bond lengths (Å) and angles (°) for complex **2**.

| Bond length, Å |            | Bond angle, °     |            |
|----------------|------------|-------------------|------------|
| Ag(1)–O(1)     | 2.396(3)   | O(1)–Ag(1)–O(1)'  | 75.51(12)  |
| Ag(1)–O(1)'    | 2.547(3)   | O(1)–Ag(1)–P(2)   | 87.36(8)   |
| Ag(1)–P(2)     | 2.4390(12) | O(1)–Ag(1)–P(3)'  | 139.81(9)  |
| Ag(1)–P(3)'    | 2.4137(12) | P(2)–Ag(1)–O(1)'  | 147.77(9)  |
| O(1)–P(1)      | 1.482(3)   | P(3)'–Ag(1)–O(1)' | 76.09(8)   |
| O(2)–P(1)      | 1.555(3)   | P(3)'–Ag(1)–P(2)  | 130.21(4)  |
| O(2)···O(4')   | 2.565(7)   | Ag(1)–O(1)–Ag(1)' | 104.49(12) |
|                |            | P(1)–O(1)–Ag(1)   | 119.19(18) |
|                |            | P(1)–O(1)–Ag(1)'  | 136.31(19) |



**Table S7.** Selected bond lengths (Å) and angles (°) for complex **3**.

| Bond length, Å |            | Bond angle, °    |            |
|----------------|------------|------------------|------------|
| Ag(1)–O(1)     | 2.352(3)   | O(1)–Ag(1)–P(5)  | 145.26(9)  |
| Ag(1)–P(5)     | 2.3823(13) | O(1)–Ag(1)–P(2)  | 85.49(9)   |
| Ag(1)–P(2)     | 2.4356(14) | P(5)–Ag(1)–P(2)  | 128.97(5)  |
| Ag(1)–O(3)     | 2.522(4)   | O(1)–Ag(1)–O(3)  | 88.17(11)  |
| Ag(2)–O(4)     | 2.266(3)   | P(5)–Ag(1)–O(3)  | 74.15(9)   |
| Ag(2)–O(5)     | 2.330(3)   | P(2)–Ag(1)–O(3)  | 127.95(9)  |
| Ag(2)–P(3)     | 2.3669(14) | O(4)–Ag(2)–O(5)  | 88.05(13)  |
| Ag(2)–O(1)     | 2.533(3)   | O(4)–Ag(2)–P(3)  | 143.73(10) |
| Ag(3)–P(6)     | 2.4416(14) | O(5)–Ag(2)–P(3)  | 122.11(9)  |
| Ag(3)–P(8)     | 2.4969(14) | O(4)–Ag(2)–O(1)  | 113.46(12) |
| Ag(3)–P(9)     | 2.4974(14) | O(5)–Ag(2)–O(1)  | 85.71(12)  |
| O(1)–P(1)      | 1.494(3)   | P(3)–Ag(2)–O(1)  | 90.34(8)   |
| O(2)–P(1)      | 1.521(3)   | P(6)–Ag(3)–P(8)  | 119.19(5)  |
| O(3)–P(4)      | 1.479(4)   | P(6)–Ag(3)–P(9)  | 125.98(5)  |
| O(4)–P(4)      | 1.517(4)   | P(8)–Ag(3)–P(9)  | 102.76(5)  |
| O(5)–P(7)      | 1.486(4)   | P(1)–O(1)–Ag(1)  | 113.51(19) |
| O(6)–P(7)      | 1.531(4)   | P(1)–O(1)–Ag(2)  | 112.76(17) |
| O(6)···O(2)    | 2.445(7)   | Ag(1)–O(1)–Ag(2) | 98.14(12)  |
|                |            | P(1)–O(2)–H(2A)  | 127.4      |
|                |            | P(4)–O(3)–Ag(1)  | 127.3(2)   |
|                |            | P(4)–O(4)–Ag(2)  | 112.7(2)   |
|                |            | P(7)–O(5)–Ag(2)  | 133.0(2)   |
|                |            | P(7)–O(6)–H(2A)  | 129.8      |
|                |            | O(1)–P(1)–O(2)   | 115.4(2)   |
|                |            | O(3)–P(4)–O(4)   | 118.5(2)   |
|                |            | O(5)–P(7)–O(6)   | 116.7(2)   |

**Table S8.** Selected bond lengths (Å) and angles (°) for complex **4** (the data correspond to two independent molecules found in the unit cell).

| Bond length, Å |           | Bond angle, °     |            |
|----------------|-----------|-------------------|------------|
| Au(1)-P(1)     | 2.321(3)  | P(1)-Au(1)-P(4)   | 144.61(10) |
| Au(1)-P(4)     | 2.380(3)  | P(1)-Au(1)-P(3)   | 87.08(10)  |
| Au(1)-P(3)     | 2.426(3)  | P(4)-Au(1)-P(3)   | 103.04(10) |
| Au(1)-P(6)     | 2.485(3)  | P(1)-Au(1)-P(6)   | 126.38(10) |
| Au(1)-Au(2)    | 2.8615(6) | P(4)-Au(1)-P(6)   | 80.37(10)  |
| Au(2)-P(5)     | 2.301(3)  | P(3)-Au(1)-P(6)   | 114.61(10) |
| Au(2)-P(2)     | 2.341(3)  | P(1)-Au(1)-Au(2)  | 75.20(7)   |
| Au(3)-P(10)    | 2.384(3)  | P(4)-Au(1)-Au(2)  | 79.85(7)   |
| Au(3)-P(7)     | 2.320(3)  | P(3)-Au(1)-Au(2)  | 149.71(7)  |
| Au(3)-P(12)    | 2.488(3)  | P(6)-Au(1)-Au(2)  | 95.65(7)   |
| Au(3)-P(9)     | 2.418(3)  | P(5)-Au(2)-P(2)   | 139.27(10) |
| Au(3)-Au(4)    | 2.8226(6) | P(5)-Au(2)-Au(1)  | 114.75(8)  |
| Au(4)-P(8)     | 2.329(3)  | P(2)-Au(2)-Au(1)  | 105.97(7)  |
| Au(4)-P(11)    | 2.300(3)  | P(10)-Au(3)-P(7)  | 145.94(10) |
| O(1)-P(1)      | 1.593(8)  | P(10)-Au(3)-P(12) | 80.58(9)   |
| O(2)-P(4)      | 1.595(8)  | P(7)-Au(3)-P(12)  | 125.33(10) |
| O(3)-P(7)      | 1.594(7)  | P(10)-Au(3)-P(9)  | 100.92(10) |
| O(4)-P(10)     | 1.597(8)  | P(7)-Au(3)-P(9)   | 87.80(10)  |
| O(1)···Cl(1)   | 2.880(9)  | P(12)-Au(3)-P(9)  | 115.46(9)  |
| O(2)···Cl(2)   | 2.926(7)  | P(10)-Au(3)-Au(4) | 81.54(7)   |
| O(3)···Cl(3)   | 2.855(9)  | P(7)-Au(3)-Au(4)  | 74.87(7)   |
| O(4)···Cl(4)   | 2.894(7)  | P(12)-Au(3)-Au(4) | 95.41(6)   |
|                |           | P(9)-Au(3)-Au(4)  | 149.08(7)  |
|                |           | P(8)-Au(4)-P(11)  | 137.88(10) |
|                |           | P(8)-Au(4)-Au(3)  | 108.73(7)  |
|                |           | P(11)-Au(4)-Au(3) | 113.24(7)  |
|                |           | O(1)-P(1)-Au(1)   | 124.3(3)   |
|                |           | O(2)-P(4)-Au(1)   | 104.5(3)   |
|                |           | O(3)-P(7)-Au(3)   | 124.4(3)   |
|                |           | O(4)-P(10)-Au(3)  | 105.2(3)   |

**Table S9.** Selected bond lengths (Å) and angles (°) for complexes **5** (acetonitrile solvate) / **5\*** (acetone solvate).

| Bond length, Å |                       | Bond angle, °   |                      |
|----------------|-----------------------|-----------------|----------------------|
| Au(2)–P(6)     | 2.2886(9)/ 2.3023(14) | P(5)–Au(1)–P(2) | 172.48(3)/ 171.13(5) |
| Au(1)–P(2)     | 2.2934(8)/ 2.3196(12) | P(3)–Au(2)–P(6) | 176.32(3)/ 176.71(5) |
| Au(2)–P(3)     | 2.2985(9)/ 2.2923(13) | O(2)–P(1)–O(1)  | 118.14(16)/ 117.4(2) |
| Au(1)–P(5)     | 2.3158(8)/ 2.2974(13) | O(4)–P(4)–O(3)  | 117.74(16)/ 118.4(2) |
| O(1)–P(1)      | 1.513(3)/ 1.535(3)    |                 |                      |
| O(2)–P(1)      | 1.482(3)/ 1.479(3)    |                 |                      |
| O(3)–P(4)      | 1.532(3)/ 1.520(4)    |                 |                      |
| O(4)–P(4)      | 1.480(3)/ 1.490(4)    |                 |                      |
| O(3)···O(1)    | 2.396(4)/ 2.391(5)    |                 |                      |

**Table S10.** Selected bond lengths (Å) and angles (°) for complex **6** (diethyl ether/acetonitrile solvate).

| Bond length, Å |                      | Bond angle, °     |                         |
|----------------|----------------------|-------------------|-------------------------|
| Au(1)–P(1)     | 2.315(2)/ 2.3175(11) | P(1)–Au(1)–P(4)   | 168.47(8)/ 167.69(4)    |
| Au(1)–P(4)     | 2.321(2)/ 2.3239(11) | P(5)–Au(2)–P(2)   | 171.34(8)/ 173.03(4)    |
| Au(1)–Au(2)    | 2.8414(5)/ 2.8695(2) | P(6)–Au(3)–P(3)   | 173.23(8)/ 172.16(4)    |
| Au(1)–Au(3)    | 2.8568(5)/ 2.8676(2) | Au(2)–Au(1)–Au(3) | 142.205(17)/ 144.772(8) |
| Au(2)–P(5)     | 2.313(2)/ 2.3178(11) |                   |                         |
| Au(2)–P(2)     | 2.315(2)/ 2.3239(11) |                   |                         |
| Au(3)–P(6)     | 2.320(2)/ 2.3162(11) |                   |                         |
| Au(3)–P(3)     | 2.320(2)/ 2.3165(11) |                   |                         |
| O(1)–P(1)      | 1.505(7)/ 1.518(3)   |                   |                         |
| O(2)–P(4)      | 1.498(7)/ 1.510(3)   |                   |                         |

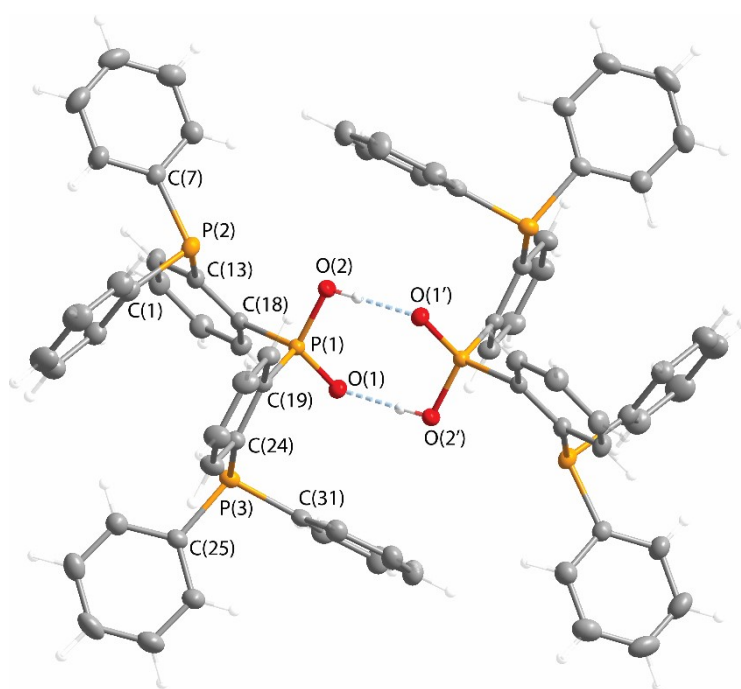

**Fig. S1.** Molecular view of hydrogen-bonded dimer of  $P^3OOH$  (displacement ellipsoids are shown at the 50% probability level).

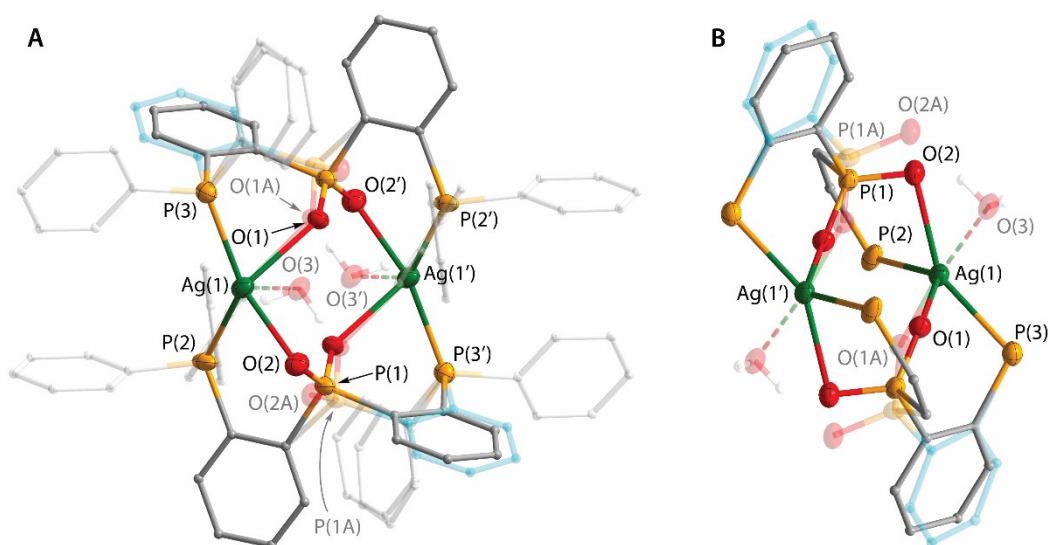

**Fig. S2.** Molecular views of  $1(X/H_2O)$  modification (displacement ellipsoids of non-carbon atoms are shown at the 50% probability level, hydrogen atoms are omitted for clarity). Disordered solvent X could not be resolved. Water molecule was refined with 0.25 occupancy. View (B) highlights a disorder of the  $POO^-$  group and phenylene spacer (second component at 0.27 occupancy is shown in semi-transparent mode).

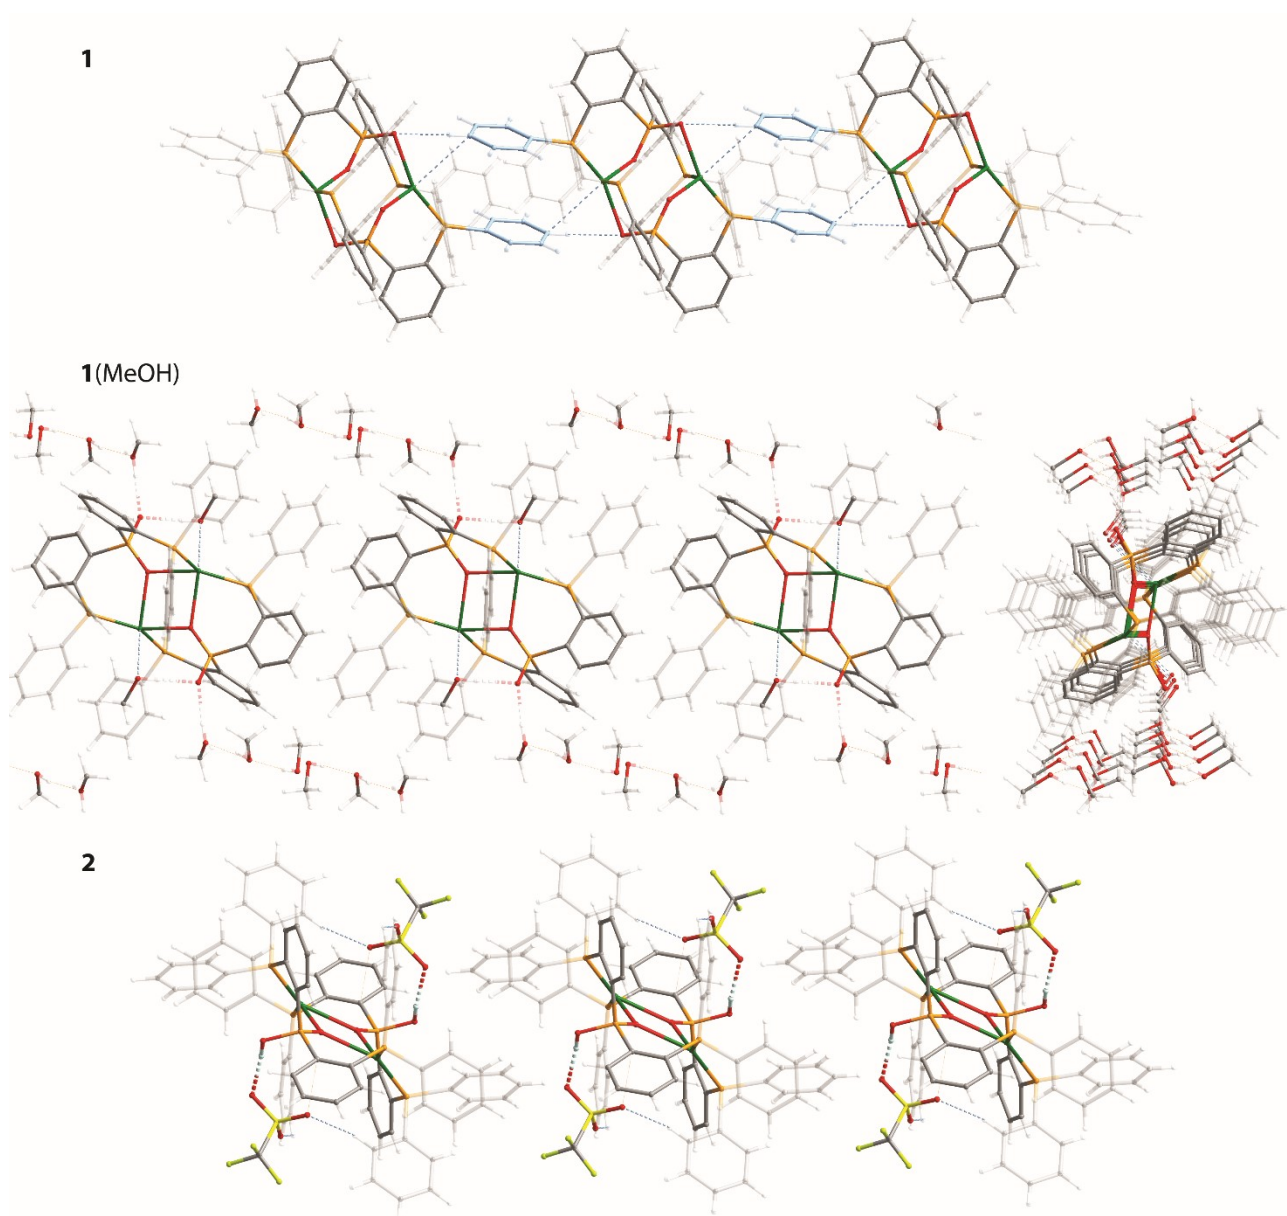

**Fig. S3.** Fragments of crystal packing of complexes **1**, **1(MeOH)** and **2**.

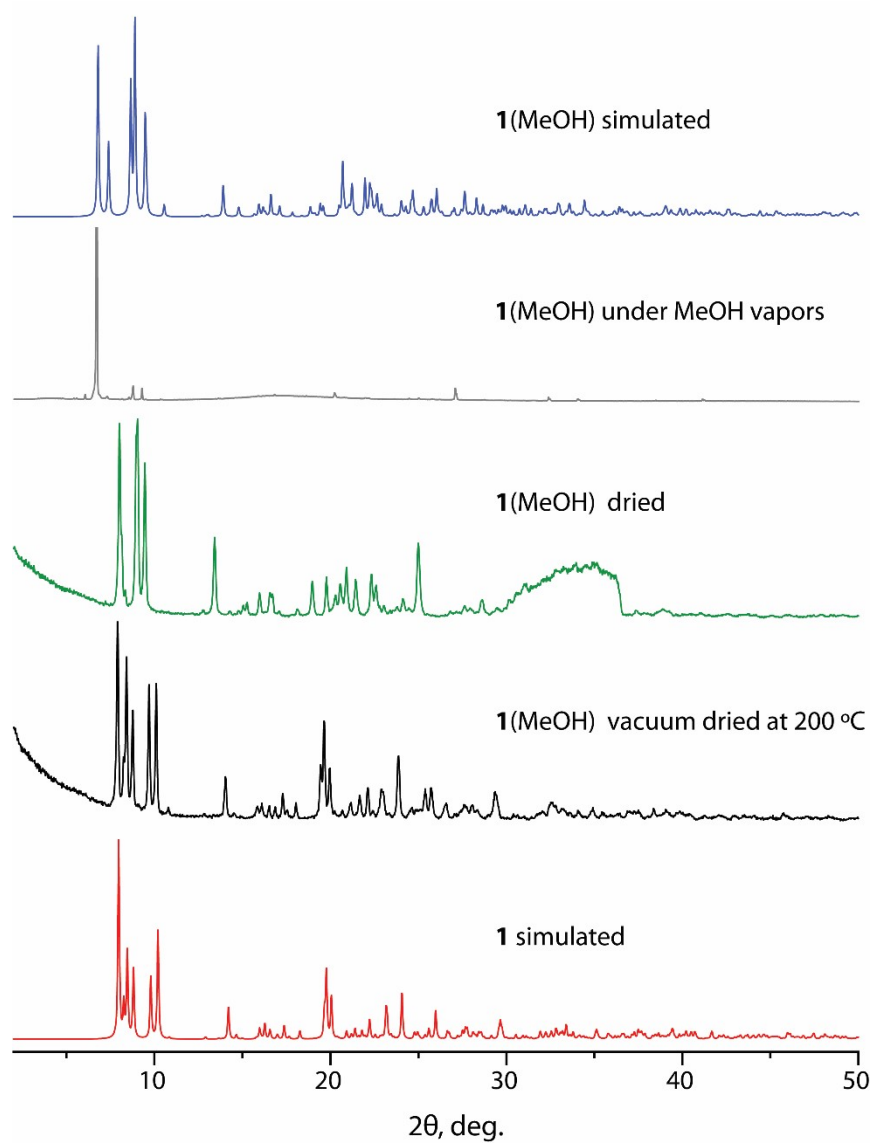

**Fig. S4.** Simulated and experimental powder X-ray diffraction patterns for **1**(MeOH) and solvent free forms of complex **1**.

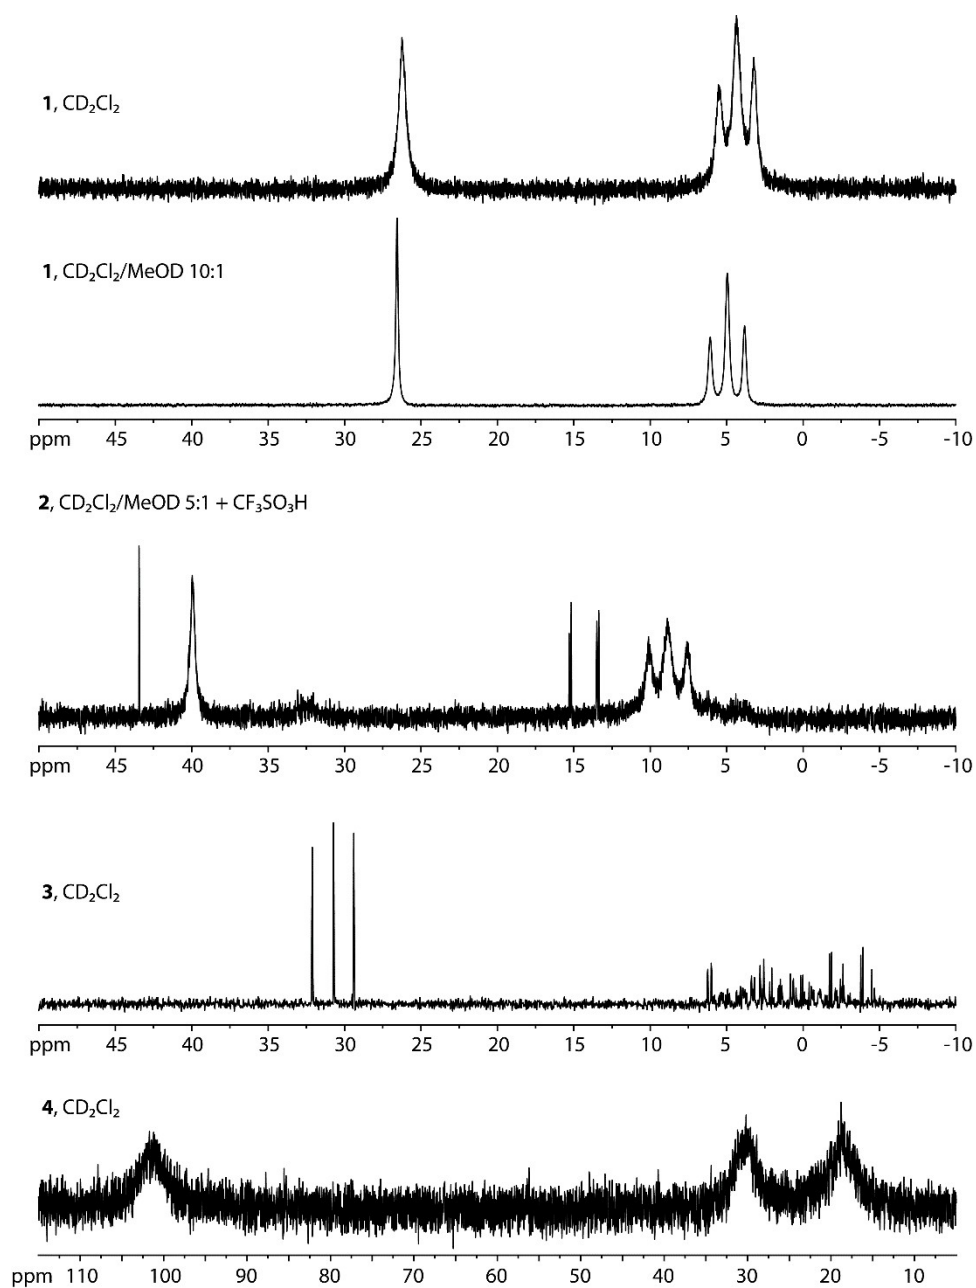

**Fig. S5.** 202 MHz  $^{31}\text{P}\{^1\text{H}\}$  NMR spectra of complexes **1–4** (297 K).

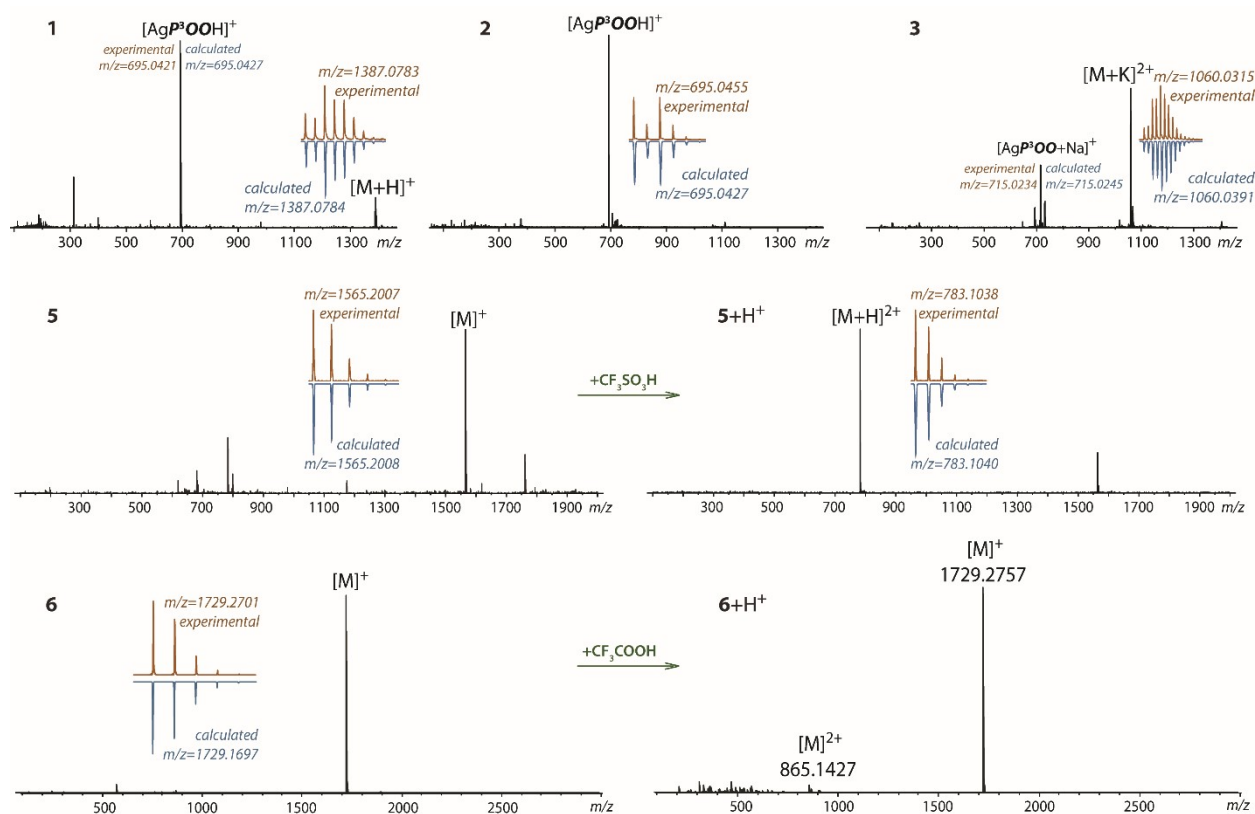

**Fig. S6.** ESI<sup>+</sup>-MS of compounds 1–5 (MeOH/acetonitrile 1:1 v/v) and 6 (acetonitrile).

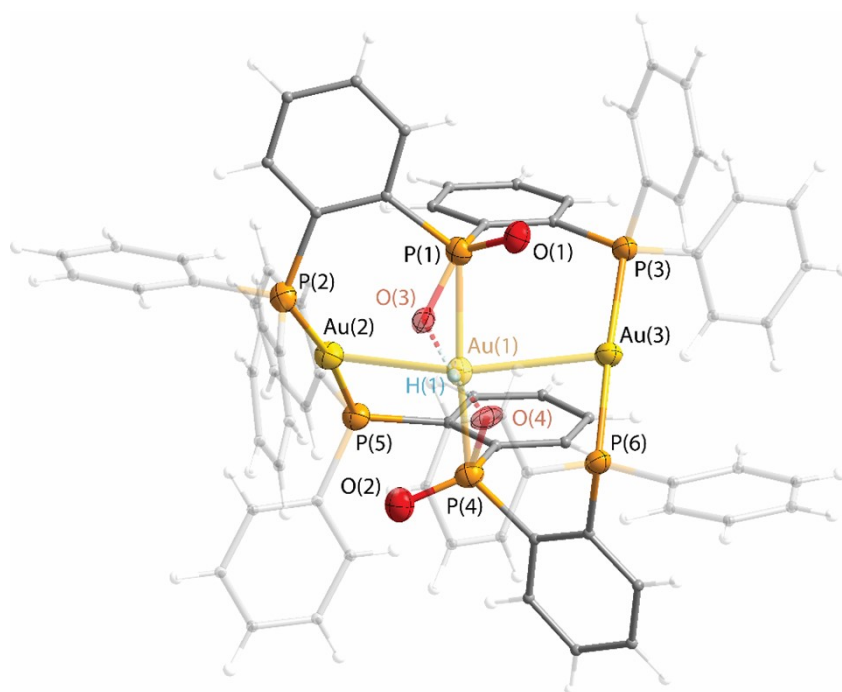

**Fig. S7.** Molecular view of co-crystallized 5 and 6 refined as a 2:1 mixture (66.7% of the O(3)⋯H(1)⋯O(4) component (5) and 33.3% of the Au(1) component (6); displacement ellipsoids of non-carbon atoms are shown at the 50% probability level).



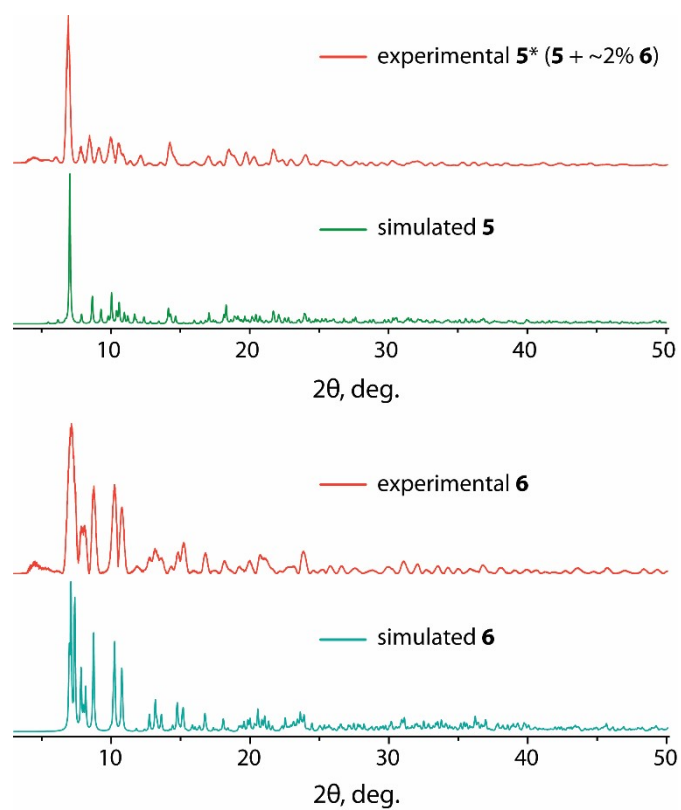

**Fig. S8.** Simulated and experimental powder X-ray diffraction patterns for **5\*** (**5** doped with **6** ca. 2%) and **6**.

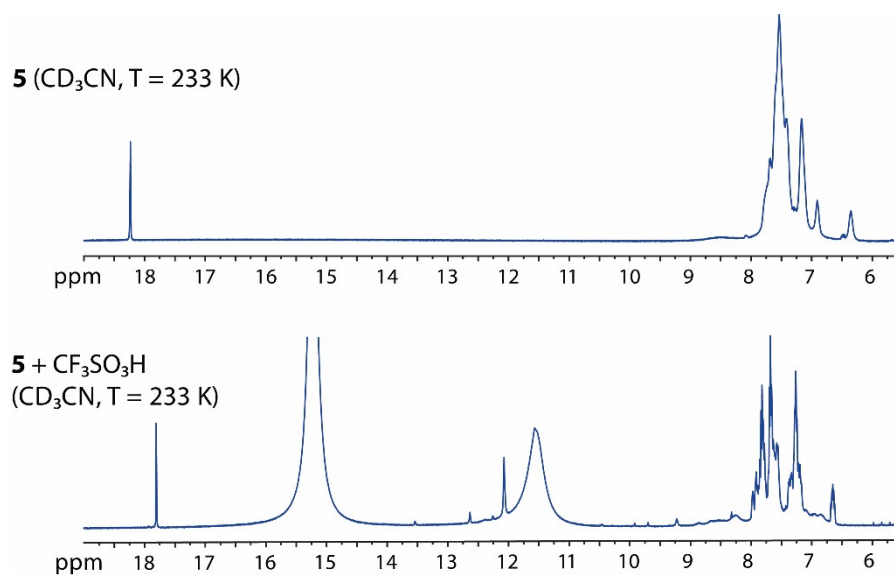

**Fig. S9.**  $^1\text{H}$  NMR spectra of complex **5** before (top) and after (bottom) addition of excess of triflic acid.

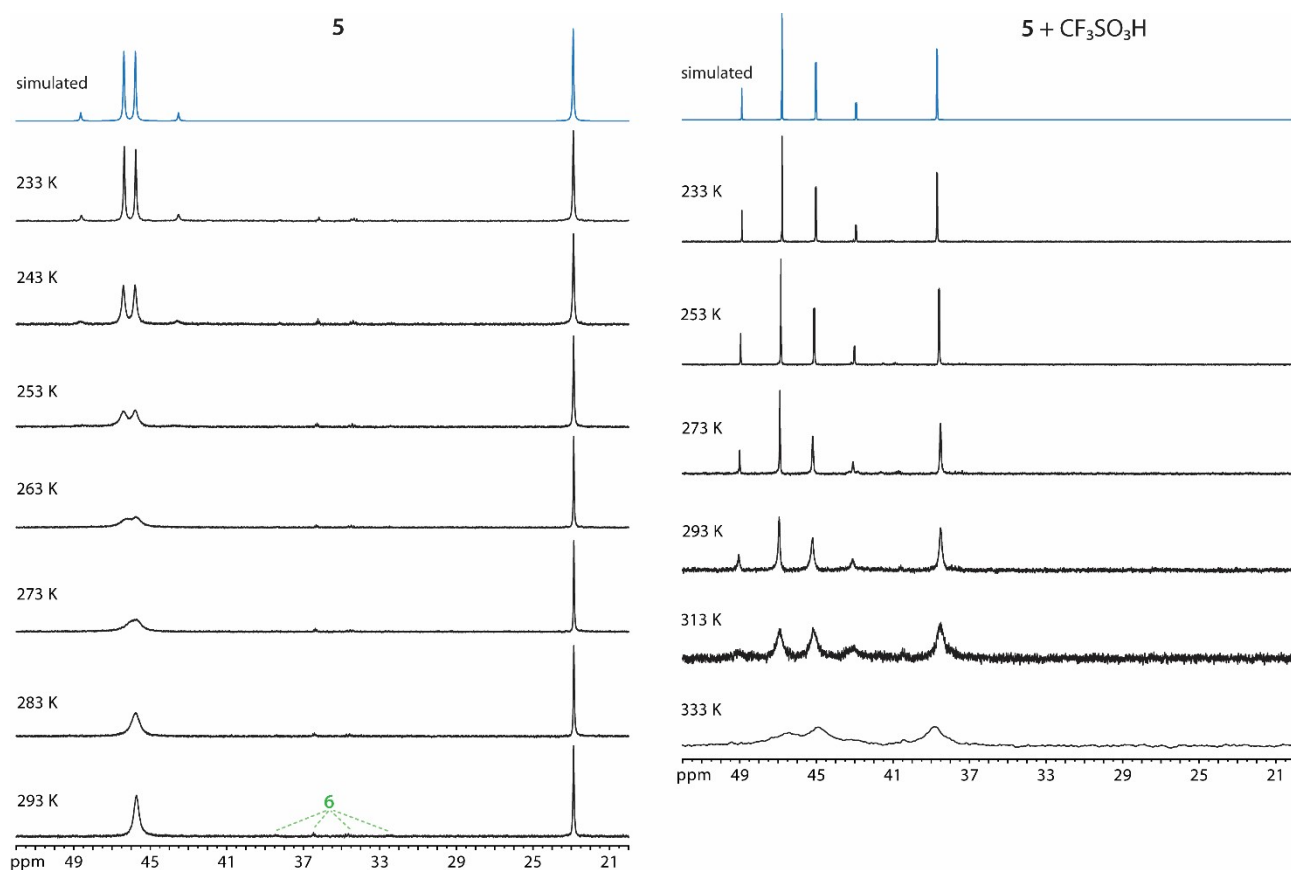

**Fig. S10.** Variable temperature 162 MHz  $^{31}\text{P}\{^1\text{H}\}$  NMR spectra of compound **5**\* before (left) and after (right) addition of excess of triflic acid (acetonitrile- $d_3$ ).

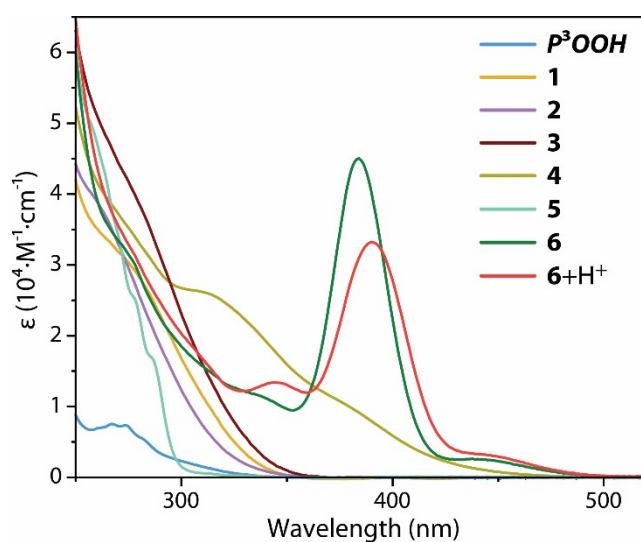

**Fig. S11.** UV-vis absorption spectra of **1**–**4**, **6**, **6**+H<sup>+</sup> and  $\text{P}^3\text{OOH}$  (dichloromethane, 297 K).

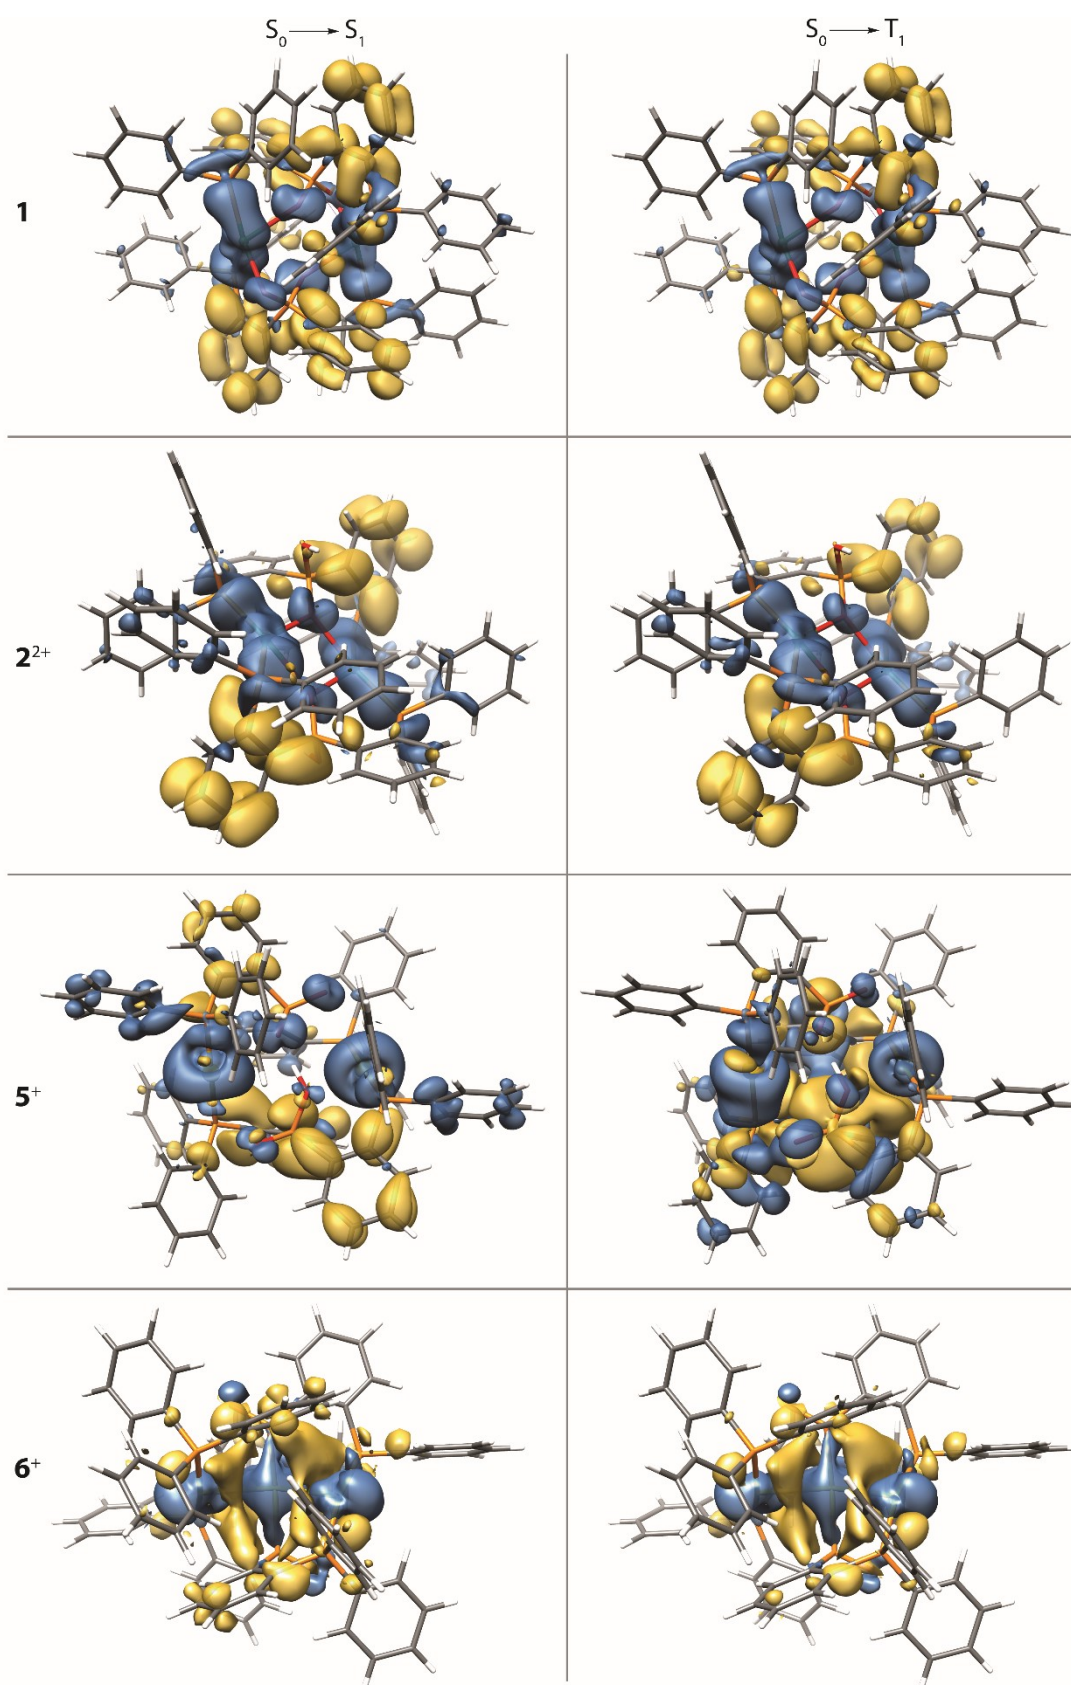

**Fig. S12.** Comparison of TD-DFT calculated transition density differences for vertical excitation from the DFT optimized ground state  $S_0$  to the  $S_1$  (left) and  $T_1$  (right) excited states for **1**, **2<sup>2+</sup>**, **5<sup>+</sup>** and **6<sup>+</sup>**. Loss of electron density shown in blue, gain in yellow. Anions have been omitted for calculations.

**Table S11.** TD-DFT calculated vertical electronic transitions from the ground state  $S_0$  at the geometry of the DFT optimized ground state  $S_0$  and triplet state  $T_1$  of **1** to the first 10 and 5 singlet and triplet excited states, respectively.

| Transition                      | Energy, eV | Energy, $\text{cm}^{-1}$ | Wavelength, nm | Oscillator strength $f$ |
|---------------------------------|------------|--------------------------|----------------|-------------------------|
| S <sub>0</sub> geometry         |            |                          |                |                         |
| S <sub>0</sub> →S <sub>1</sub>  | 3.543939   | 28583.8                  | 349.8          | 0.0000                  |
| S <sub>0</sub> →S <sub>2</sub>  | 3.571005   | 28802.1                  | 347.2          | 0.0100                  |
| S <sub>0</sub> →S <sub>3</sub>  | 3.69662    | 29815.3                  | 335.4          | 0.0186                  |
| S <sub>0</sub> →S <sub>4</sub>  | 3.720813   | 30010.4                  | 333.2          | 0.0000                  |
| S <sub>0</sub> →S <sub>5</sub>  | 3.893236   | 31401.1                  | 318.5          | 0.0672                  |
| S <sub>0</sub> →S <sub>6</sub>  | 3.897293   | 31433.8                  | 318.1          | 0.0077                  |
| S <sub>0</sub> →S <sub>7</sub>  | 3.929819   | 31696.1                  | 315.5          | 0.0858                  |
| S <sub>0</sub> →S <sub>8</sub>  | 3.945994   | 31826.6                  | 314.2          | 0.0082                  |
| S <sub>0</sub> →S <sub>9</sub>  | 3.950146   | 31860.1                  | 313.9          | 0.0002                  |
| S <sub>0</sub> →S <sub>10</sub> | 3.967599   | 32000.8                  | 312.5          | 0.0000                  |
| S <sub>0</sub> →T <sub>1</sub>  | 3.402585   | 27443.7                  | 364.4          |                         |
| S <sub>0</sub> →T <sub>2</sub>  | 3.418404   | 27571.3                  | 362.7          |                         |
| S <sub>0</sub> →T <sub>3</sub>  | 3.475765   | 28033.9                  | 356.7          |                         |
| S <sub>0</sub> →T <sub>4</sub>  | 3.477728   | 28049.8                  | 356.5          |                         |
| S <sub>0</sub> →T <sub>5</sub>  | 3.496681   | 28202.6                  | 354.6          |                         |
| S <sub>0</sub> →T <sub>6</sub>  | 3.49941    | 28224.7                  | 354.3          |                         |
| S <sub>0</sub> →T <sub>7</sub>  | 3.652652   | 29460.6                  | 339.4          |                         |
| S <sub>0</sub> →T <sub>8</sub>  | 3.657407   | 29499                    | 339            |                         |
| S <sub>0</sub> →T <sub>9</sub>  | 3.720177   | 30005.3                  | 333.3          |                         |
| S <sub>0</sub> →T <sub>10</sub> | 3.721586   | 30016.6                  | 333.1          |                         |
| T <sub>1</sub> geometry         |            |                          |                |                         |
| S <sub>0</sub> →S <sub>1</sub>  | 2.090841   | 16863.8                  | 593            | 0.0160                  |
| S <sub>0</sub> →S <sub>2</sub>  | 2.246052   | 18115.6                  | 552            | 0.0053                  |
| S <sub>0</sub> →S <sub>3</sub>  | 2.512923   | 20268.1                  | 493.4          | 0.0055                  |
| S <sub>0</sub> →S <sub>4</sub>  | 2.5831     | 20834.1                  | 480            | 0.0001                  |
| S <sub>0</sub> →S <sub>5</sub>  | 2.667193   | 21512.4                  | 464.8          | 0.0071                  |
| S <sub>0</sub> →T <sub>1</sub>  | 1.906076   | 15373.5                  | 650.5          |                         |
| S <sub>0</sub> →T <sub>2</sub>  | 2.159631   | 17418.6                  | 574.1          |                         |
| S <sub>0</sub> →T <sub>3</sub>  | 2.449851   | 19759.4                  | 506.1          |                         |
| S <sub>0</sub> →T <sub>4</sub>  | 2.538707   | 20476.1                  | 488.4          |                         |
| S <sub>0</sub> →T <sub>5</sub>  | 2.580059   | 20809.6                  | 480.5          |                         |

**Table S12.** TD-DFT calculated vertical electronic transitions from the DFT optimized ground state  $S_0$  of  $2^{2+}$  to the first 10 singlet and triplet excited states.

| Transition               | Energy, eV | Energy, $\text{cm}^{-1}$ | Wavelength, nm | Oscillator strength $f$ |
|--------------------------|------------|--------------------------|----------------|-------------------------|
| $S_0 \rightarrow S_1$    | 3.831297   | 30901.5                  | 323.6          | 0.0000                  |
| $S_0 \rightarrow S_2$    | 3.911722   | 31550.2                  | 317.0          | 0.0857                  |
| $S_0 \rightarrow S_3$    | 4.043918   | 32616.4                  | 306.6          | 0.0291                  |
| $S_0 \rightarrow S_4$    | 4.107844   | 33132                    | 301.8          | 0.0000                  |
| $S_0 \rightarrow S_5$    | 4.220341   | 34039.4                  | 293.8          | 0.0095                  |
| $S_0 \rightarrow S_6$    | 4.266188   | 34409.1                  | 290.6          | 0.0000                  |
| $S_0 \rightarrow S_7$    | 4.276734   | 34494.2                  | 289.9          | 0.0312                  |
| $S_0 \rightarrow S_8$    | 4.324774   | 34881.7                  | 286.7          | 0.0000                  |
| $S_0 \rightarrow S_9$    | 4.371025   | 35254.7                  | 283.7          | 0.0000                  |
| $S_0 \rightarrow S_{10}$ | 4.415449   | 35613                    | 280.8          | 0.1195                  |
| $S_0 \rightarrow T_1$    | 3.619891   | 29196.4                  | 342.5          |                         |
| $S_0 \rightarrow T_2$    | 3.648431   | 29426.6                  | 339.8          |                         |
| $S_0 \rightarrow T_3$    | 3.745528   | 30209.7                  | 331.0          |                         |
| $S_0 \rightarrow T_4$    | 3.765075   | 30367.4                  | 329.3          |                         |
| $S_0 \rightarrow T_5$    | 3.821327   | 30821.1                  | 324.5          |                         |
| $S_0 \rightarrow T_6$    | 3.83259    | 30911.9                  | 323.5          |                         |
| $S_0 \rightarrow T_7$    | 3.933904   | 31729.1                  | 315.2          |                         |
| $S_0 \rightarrow T_8$    | 3.94874    | 31848.7                  | 314.0          |                         |
| $S_0 \rightarrow T_9$    | 3.978247   | 32086.7                  | 311.7          |                         |
| $S_0 \rightarrow T_{10}$ | 3.978848   | 32091.6                  | 311.6          |                         |

**Table S13.** TD-DFT calculated vertical electronic transitions from the DFT optimized ground state  $S_0$  of  $5^+$  to the first 10 singlet and triplet excited states.

| Transition               | Energy, eV | Energy, $\text{cm}^{-1}$ | Wavelength, nm | Oscillator strength $f$ |
|--------------------------|------------|--------------------------|----------------|-------------------------|
| $S_0 \rightarrow S_1$    | 4.470523   | 36057                    | 277.3          | 0.0817                  |
| $S_0 \rightarrow S_2$    | 4.480441   | 36137                    | 276.7          | 0.0236                  |
| $S_0 \rightarrow S_3$    | 4.530283   | 36539                    | 273.7          | 0.2933                  |
| $S_0 \rightarrow S_4$    | 4.561032   | 36787                    | 271.8          | 0.0087                  |
| $S_0 \rightarrow S_5$    | 4.592276   | 37039                    | 270.0          | 0.0033                  |
| $S_0 \rightarrow S_6$    | 4.670386   | 37669                    | 265.5          | 0.0341                  |
| $S_0 \rightarrow S_7$    | 4.706342   | 37959                    | 263.4          | 0.0268                  |
| $S_0 \rightarrow S_8$    | 4.745521   | 38275                    | 261.3          | 0.0188                  |
| $S_0 \rightarrow S_9$    | 4.764243   | 38426                    | 260.2          | 0.0266                  |
| $S_0 \rightarrow S_{10}$ | 4.788544   | 38622                    | 258.9          | 0.0899                  |
| $S_0 \rightarrow T_1$    | 3.694997   | 29802                    | 335.5          |                         |
| $S_0 \rightarrow T_2$    | 3.727109   | 30061                    | 332.7          |                         |
| $S_0 \rightarrow T_3$    | 3.762321   | 30345                    | 329.5          |                         |
| $S_0 \rightarrow T_4$    | 3.768520   | 30395                    | 329.0          |                         |
| $S_0 \rightarrow T_5$    | 3.851466   | 31064                    | 321.9          |                         |
| $S_0 \rightarrow T_6$    | 3.852458   | 31072                    | 321.8          |                         |
| $S_0 \rightarrow T_7$    | 3.853450   | 31080                    | 321.7          |                         |
| $S_0 \rightarrow T_8$    | 3.858657   | 31122                    | 321.3          |                         |
| $S_0 \rightarrow T_9$    | 3.873907   | 31245                    | 320.1          |                         |
| $S_0 \rightarrow T_{10}$ | 3.902796   | 31478                    | 317.7          |                         |

**Table S14.** TD-DFT calculated vertical electronic transitions from the DFT optimized ground state  $S_0$  of  $6^+$  to the first 10 singlet and triplet excited states.

| Transition               | Energy, eV | Energy, $\text{cm}^{-1}$ | Wavelength, nm | Oscillator strength $f$ |
|--------------------------|------------|--------------------------|----------------|-------------------------|
| $S_0 \rightarrow S_1$    | 3.18957    | 25726                    | 388.7          | 0.5088                  |
| $S_0 \rightarrow S_2$    | 3.27992    | 26454                    | 378.0          | 0.0013                  |
| $S_0 \rightarrow S_3$    | 3.450943   | 27834                    | 359.3          | 0.0210                  |
| $S_0 \rightarrow S_4$    | 3.536861   | 28527                    | 350.5          | 0.0253                  |
| $S_0 \rightarrow S_5$    | 3.588773   | 28945                    | 345.5          | 0.0509                  |
| $S_0 \rightarrow S_6$    | 3.689599   | 29759                    | 336.0          | 0.0644                  |
| $S_0 \rightarrow S_7$    | 3.769843   | 30406                    | 328.9          | 0.0569                  |
| $S_0 \rightarrow S_8$    | 3.824451   | 30846                    | 324.2          | 0.0078                  |
| $S_0 \rightarrow S_9$    | 3.864567   | 31170                    | 320.8          | 0.0405                  |
| $S_0 \rightarrow S_{10}$ | 3.880835   | 31301                    | 319.5          | 0.0277                  |
| $S_0 \rightarrow T_1$    | 2.788198   | 22488.3                  | 444.7          |                         |
| $S_0 \rightarrow T_2$    | 3.091411   | 24933.9                  | 401.1          |                         |
| $S_0 \rightarrow T_3$    | 3.292939   | 26559.3                  | 376.5          |                         |
| $S_0 \rightarrow T_4$    | 3.333829   | 26889.1                  | 371.9          |                         |
| $S_0 \rightarrow T_5$    | 3.423875   | 27615.4                  | 362.1          |                         |
| $S_0 \rightarrow T_6$    | 3.492133   | 28166                    | 355            |                         |
| $S_0 \rightarrow T_7$    | 3.613216   | 29142.6                  | 343.1          |                         |
| $S_0 \rightarrow T_8$    | 3.623175   | 29222.9                  | 342.2          |                         |
| $S_0 \rightarrow T_9$    | 3.658965   | 29511.5                  | 338.9          |                         |
| $S_0 \rightarrow T_{10}$ | 3.678348   | 29667.9                  | 337.1          |                         |



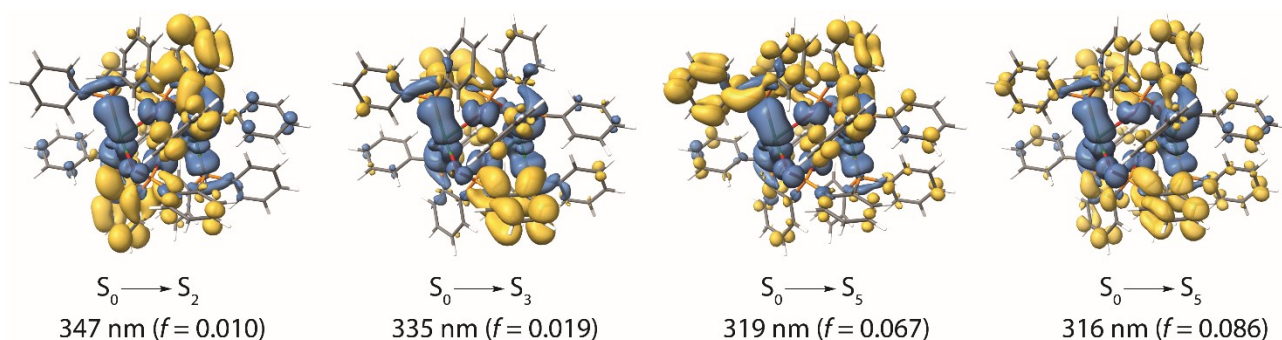

**Fig. S13.** TD-DFT calculated transition density differences of selected vertical excitations from the DFT-optimized ground state  $S_0$  relevant for the observed experimental absorption spectrum for compound **1**.

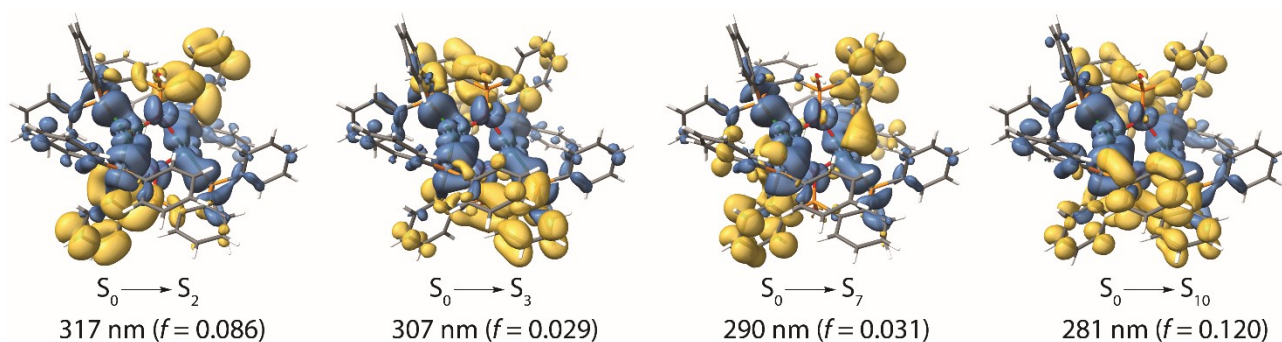

**Fig. S14.** TD-DFT calculated transition density differences of selected vertical excitations from the DFT-optimized ground state  $S_0$  relevant for the observed experimental absorption spectrum for compound **2<sup>2+</sup>**.

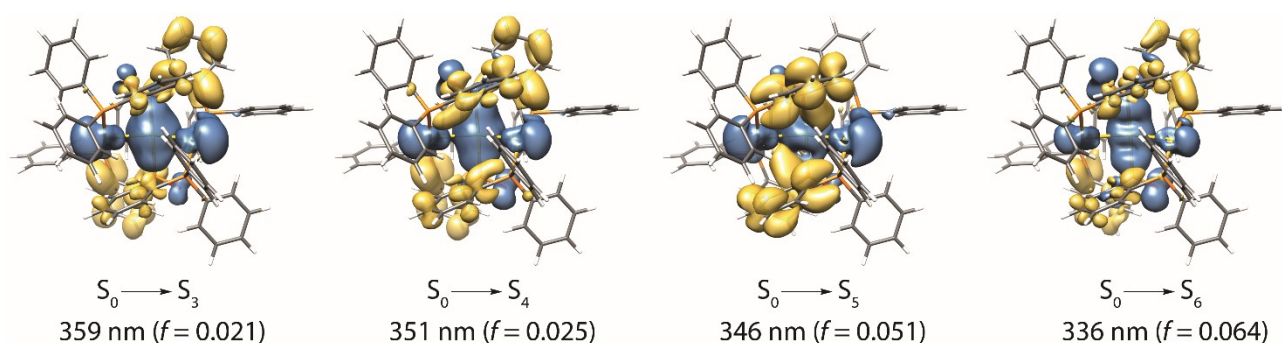

**Fig. S15.** TD-DFT calculated transition density differences of selected vertical excitations from the DFT-optimized ground state  $S_0$  relevant for the observed experimental absorption spectrum for compound **6<sup>+</sup>**.



**Table S15.** Photophysical properties of **6** and **6+H<sup>+</sup>** in solution (dichloromethane, 297 K).

| compound               | $\lambda_{\text{abs}}$ , nm ( $\epsilon$ , $10^3 \text{ M}^{-1}\text{cm}^{-1}$ ) | $\lambda_{\text{em}}$ , nm | $\tau_{\text{obs}}$ , $\mu\text{s}^a$ | $\Phi_{\text{em}}^a$ | $k_r$ , $10^5 \text{ s}^{-1}^b$ | $k_{nr}$ , $10^5 \text{ s}^{-1}^c$ |
|------------------------|----------------------------------------------------------------------------------|----------------------------|---------------------------------------|----------------------|---------------------------------|------------------------------------|
| <b>6</b>               | 277sh (30.6), 338sh (11.4),<br>384 (45.0), 440 (2.6)                             | 500                        | -                                     | 0.004                | -                               | -                                  |
| <b>6+H<sup>+</sup></b> | 277sh (31.8), 344 (13.4),<br>390 (33.2), 450 (2.9)                               | 512                        | 4.01                                  | 0.709                | 1.77                            | 0.73                               |

<sup>a</sup> oxygen-free conditions; <sup>b</sup>  $k_r = \Phi_{\text{em}}/\tau_{\text{obs}}$ ; <sup>c</sup>  $k_{nr} = (1 - \Phi_{\text{em}})/\tau_{\text{obs}}$ .

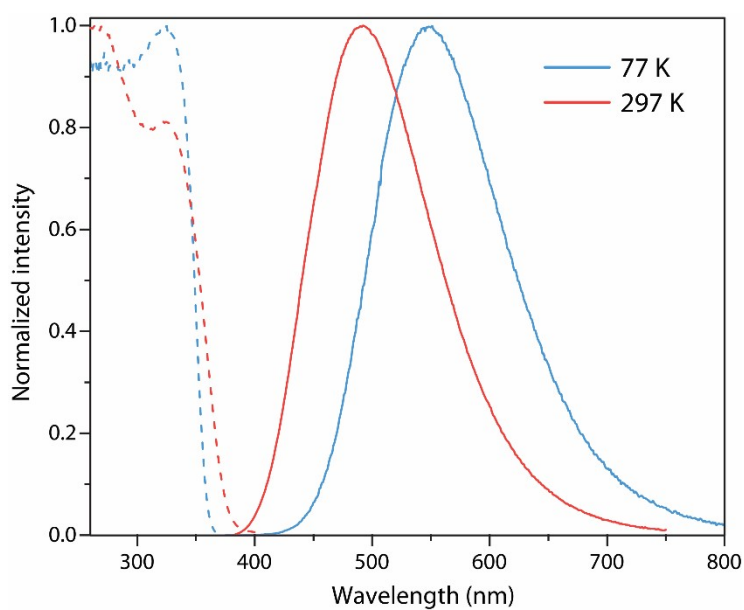

**Fig. S16.** Normalized excitation (dashed lines) and emission (solid lines) spectra of **P<sup>3</sup>OOH** ligand in the solid state.

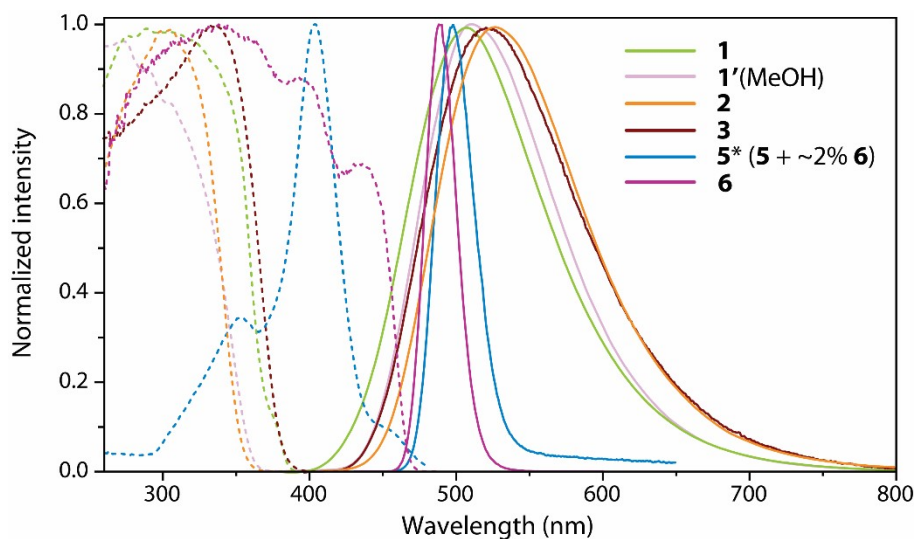

**Fig. S17.** Normalized excitation (dashed lines) and emission (solid lines) spectra of complexes **1–3**, **6** and **5\*** (**5** doped with ca. 2% **6**) in the solid state at 77 K.

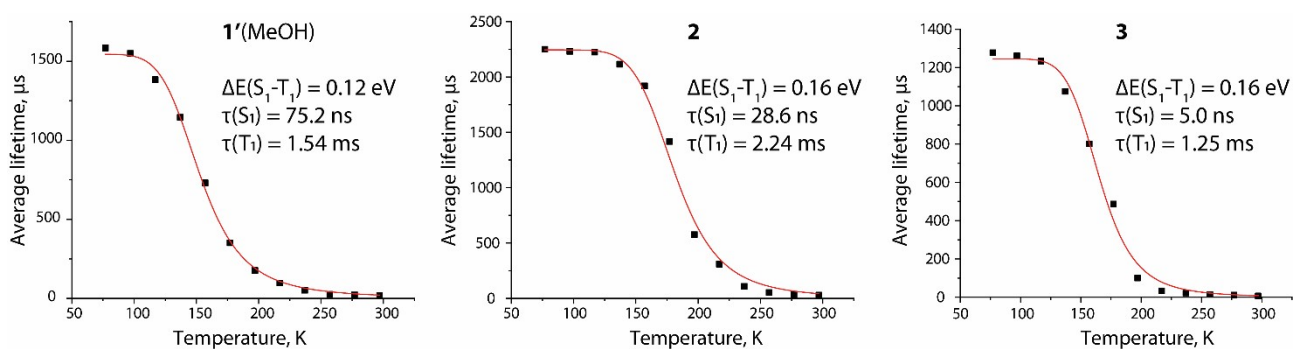

$$\tau_{\text{r av}}(T) = \frac{3 + \exp\left[-\frac{\Delta E(S_1 - T_1)}{k_B T}\right]}{\frac{3}{\tau(T_1)} + \left[\frac{1}{\tau(S_1)}\right]\exp\left[-\frac{\Delta E(S_1 - T_1)}{k_B T}\right]} \quad (\text{eqn. S1})$$

**Fig. S18.** Temperature dependence of observed average lifetimes of compounds **1'(MeOH)**, **2** and **3** in the solid state (excited state characteristics were obtained from the fit based on the two-state model, eqn. S1).

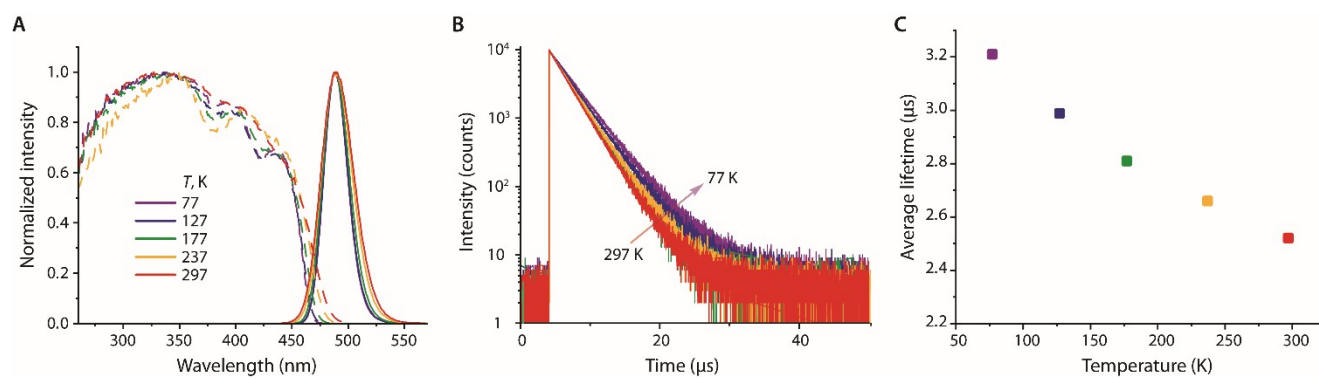

**Fig. S19.** Variable temperature excitation and emission spectra (A), intensity decays (B), observed average lifetimes of complex **6** in the solid state.

## References

1. X. Tan, W. Zeng, X. Zhang, L. W. Chung and X. Zhang, Development of a novel secondary phosphine oxide–ruthenium(II) catalyst and its application for carbonyl reduction, *Chem. Commun.*, 2018, **54**, 535-538.
2. R. Uson, A. Laguna and M. Laguna, (Tetrahydrothiophene)Gold(I) or Gold(III) Complexes, *Inorg. Synth.*, 1989, **26**, 85-91.
3. B. K. Teo, Y. H. Xu, B. Y. Zhong, Y. K. He, H. Y. Chen, W. Qian, Y. J. Deng and Y. H. Zou, A Comparative Study of Third-Order Nonlinear Optical Properties of Silver Phenylacetylide and Related Compounds via Ultrafast Optical Kerr Effect Measurements, *Inorg. Chem.*, 2001, **40**, 6794-6801.
4. M. Beliaeva, A. Belyaev, E. V. Grachova, A. Steffen and I. O. Koshevoy, Ditopic phosphide oxide group: a rigidifying Lewis base to switch luminescence and reactivity of a disilver complex, *J. Am. Chem. Soc.*, 2021, **143**, 15045–15055.
5. I. O. Koshevoy, recent unpublished, recent unpublished.
6. *APEX2 - Software Suite for Crystallographic Programs*, Bruker AXS, Inc., 2010.
7. *CrysAlisPro*, Rigaku Oxford Diffraction, 1.171.43.144a, 2024.
8. G. M. Sheldrick, Crystal structure refinement with SHELXL, *Acta Crystallogr. C: Struct. Chem.*, 2015, **71**, 3-8.
9. L. J. Farrugia, WinGX and ORTEP for Windows: an Update, *J. Appl. Crystallogr.*, 2012, **45**, 849–854.
10. O. V. Dolomanov, L. J. Bourhis, R. J. Gildea, J. A. K. Howard and H. Puschmann, OLEX2: A complete structure solution, refinement and analysis program, *J. Appl. Cryst.*, 2009, **42**, 339-341.
11. G. M. Sheldrick, *SADABS-2008/1 - Bruker AXS Area Detector Scaling and Absorption Correction*, Bruker AXS, 2008.
12. A. L. Spek, PLATON SQUEEZE: a tool for the calculation of the disordered solvent contribution to the calculated structure factors, *Acta Cryst.*, 2015, **C71**, 9–18.
13. M. Nardelli, Modeling hydroxyl and water H atoms, *J. Appl. Cryst.*, 1999, **32**, 563-571.
14. F. Neese, Software update: The ORCA program system - Version 5.0, *WIREs Comput. Mol. Sci.*, 2022, **n/a**, e1606.
15. A. D. Becke, Density-functional exchange-energy approximation with correct asymptotic behavior, *Phys. Rev. A*, 1988, 3098-3100.

16. F. Weigend and R. Ahlrichs, Balanced Basis Sets of Split Valence, Triple Zeta Valence and Quadruple Zeta Valence Quality for H to Rn: Design and Assessment of Accuracy, *Phys. Chem. Chem. Phys.*, 2005, **7**, 3297-3305.
17. F. Weigend, Accurate Coulomb-fitting basis sets for H to Rn, *Phys. Chem. Chem. Phys.*, 2006, **8**, 1057-1065.
18. D. A. Pantazis and F. Neese, All-Electron Scalar Relativistic Basis Sets for the Lanthanides, *J. Chem. Theory Comput.*, 2009, **5**, 2229-2238.
19. D. A. Pantazis, X.-Y. Chen, C. R. Landis and F. Neese, All-Electron Scalar Relativistic Basis Sets for Third-Row Transition Metal Atoms, *J. Chem. Theory Comput.*, 2008, **4**, 908-919.
20. D. A. Pantazis and F. Neese, All-electron scalar relativistic basis sets for the 6p elements, *Theor. Chem. Acc.*, 2012, **131**, 1292.
21. D. A. Pantazis and F. Neese, All-Electron Scalar Relativistic Basis Sets for the Actinides, *J. Chem. Theory Comput.*, 2011, **7**, 677-684.
22. J. D. Rolfes, F. Neese and D. A. Pantazis, All-electron scalar relativistic basis sets for the elements Rb–Xe, *J. Comput. Chem.*, 2020, **41**, 1842-1849.
23. S. Grimme, J. Antony, S. Ehrlich and H. Krieg, A consistent and accurate ab initio parametrization of density functional dispersion correction (DFT-D) for the 94 elements H–Pu *J. Chem. Phys.*, 2010, **132**, 154104.
24. S. Grimme, S. Ehrlich and L. Goerigk, Effect of the damping function in dispersion corrected density functional theory, *J. Comput. Chem.*, 2011, **32**, 1456-1465.
25. J. P. Perdew, K. Burke and M. Ernzerhof, Generalized Gradient Approximation Made Simple, *Phys. Rev. Lett.*, 1996, **77**, 3865-3868.
26. C. Adamo and V. Barone, Toward reliable density functional methods without adjustable parameters: The PBE0 model, *J. Chem. Phys.*, 1999, **110**, 6158-6170.
27. E. F. Pettersen, T. D. Goddard, C. C. Huang, G. S. Couch, D. M. Greenblatt, E. C. Meng and T. E. Ferrin, UCSF Chimera—A visualization system for exploratory research and analysis, *J. Comput. Chem.*, 2004, **25**, 1605-1612.
